# Supplementary material for: Targeting Mitochondrial Damage as a Therapeutic for Ileal Crohn’s Disease
Source: MDPI journal article supplement (doi:10.3390/cells10061349), 2021-05-29
Supplement: s1 [file s1]

Supplemental Figure S1

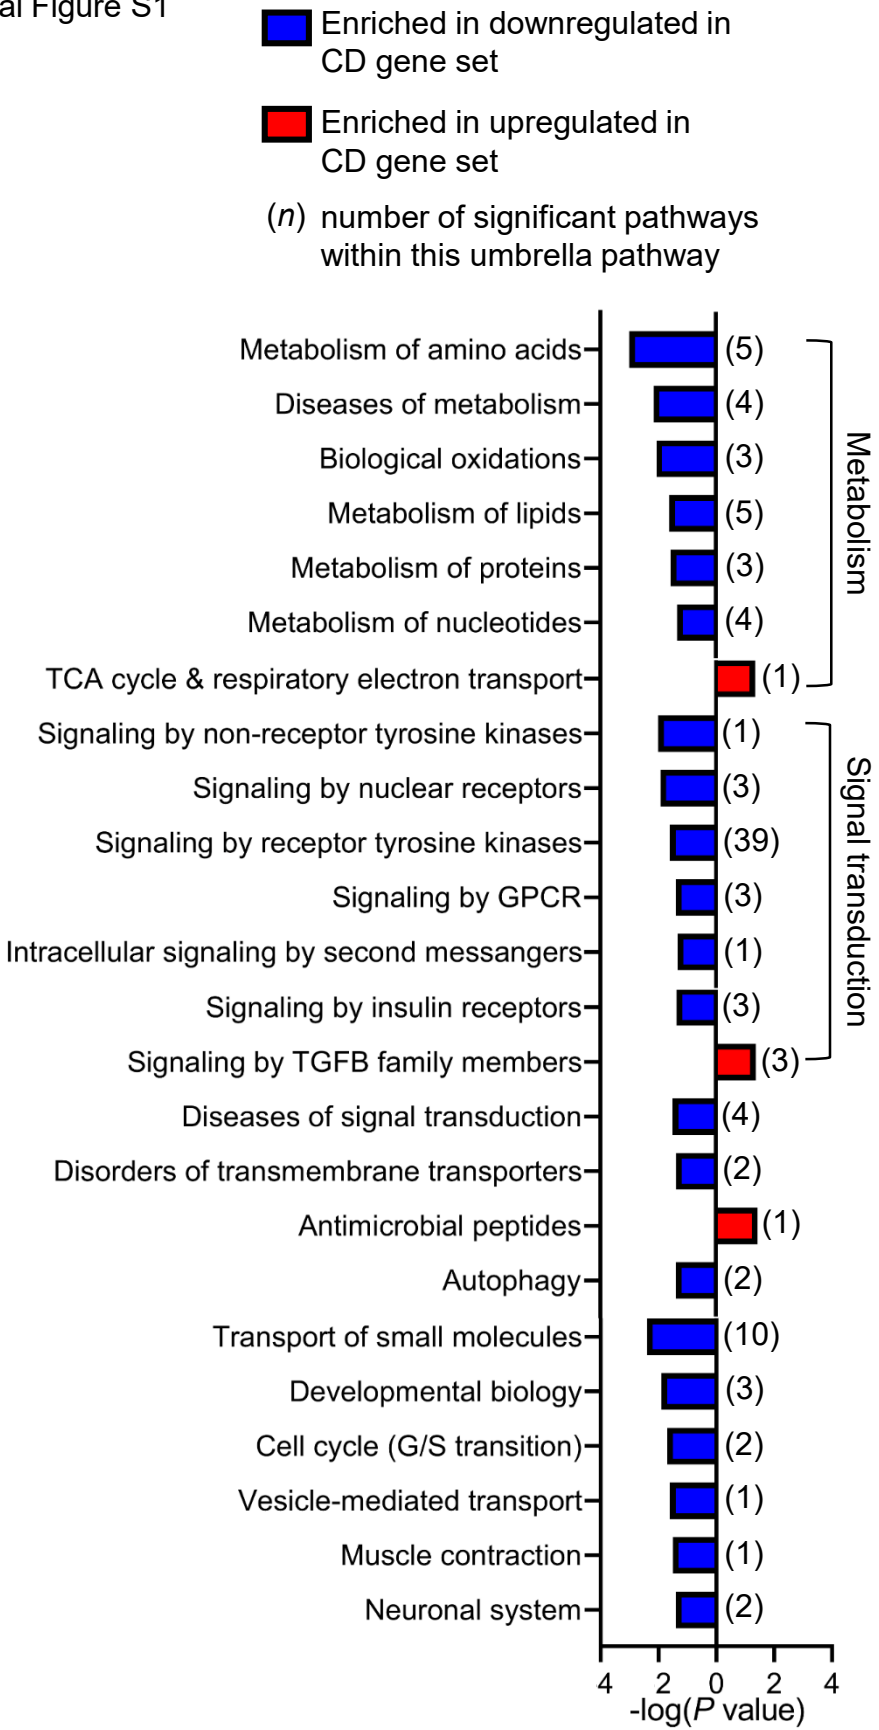

**Supplemental Figure S1. Significantly enriched gene signatures in CD vs non-IBD patients by Reactome analysis.** General umbrella pathways are indicated by brackets.  $P < 0.05$  was considered significant in pathway selection.

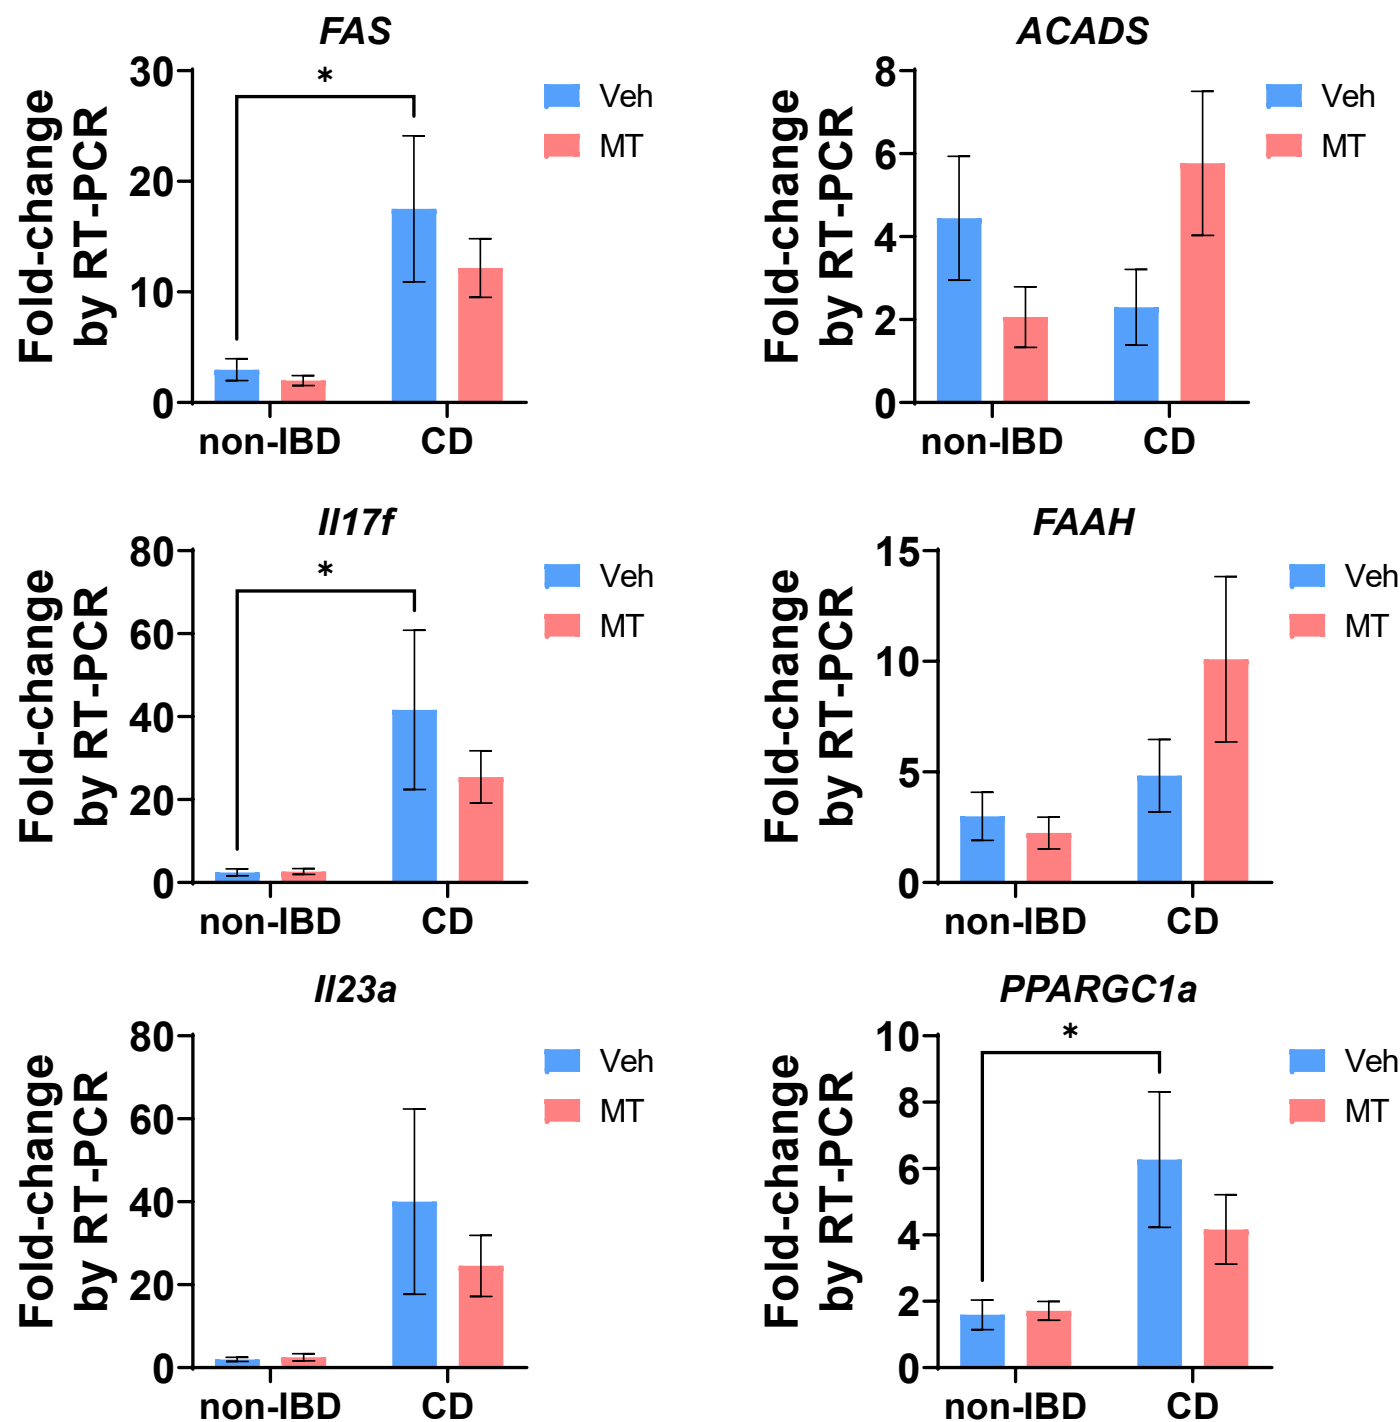

**Supplemental Figure S2.** RNA expression of several transcripts in human ileal mucosal biopsies by quantitative real time-PCR. Results are presented as mean  $\pm$  SEM of 9-10 non-IBD veh, 10-12 non-IBD MT, 8-12 CD veh, and 12-14 CD MT biopsies. \* $P < 0.05$  by two-way ANOVA and Tukey's post-hoc test.
