# Supplementary material for: Targeting Mitochondrial Damage as a Therapeutic for Ileal Crohn’s Disease
Source: Cells. 2021 May 29;10(6):1349. doi: 10.3390/cells10061349 (PMC8226558; doi:10.3390/cells10061349)
Supplement: Supplementary file 1 [file cells-10-01349-s001.zip › Supplemental Tables S1-S5.xlsx]

## Sheet: Supplemental Table S1
Supplemental Table S1. 2297 (1232+1065) DEGs altered in CD vehicle versus non-IBD vehicle
Upregulated					Downregulated
Gene	padj	pvalue	log2FoldChange		Gene	padj	pvalue	log2FoldChange
DUOX2	1.0624e-20	4.3654e-25	5.4276		CTC-575D19.1	3.1748e-11	2.4786e-14	-3.2277
CSF3R	2.2585e-17	1.8807e-21	3.6519		MT1M	5.4009e-09	1.0208e-11	-2.7138
MUC1	2.2585e-17	2.784e-21	3.9342		FZD7	8.7577e-08	2.5909e-10	-1.7496
IGLV3-9	6.1339e-17	1.0082e-20	4.4081		RP11-884K10.6	6.943e-07	3.1667e-09	-2.9157
CD300E	2.4635e-15	5.0612e-19	4.339		NRK	2.2207e-06	1.2045e-08	-2.7111
FOLH1	2.9931e-15	7.6587e-19	4.5052		MT1DP	3.8213e-06	2.2453e-08	-2.5628
MYEOV	2.9931e-15	8.609e-19	4.0643		TMPRSS7	3.8259e-06	2.2795e-08	-2.6431
FCGR3B	3.7199e-15	1.2228e-18	4.231		MT1G	4.1224e-06	2.4808e-08	-1.9914
CXCR2	1.0377e-14	3.8373e-18	3.978		MT1H	4.6834e-06	2.8481e-08	-2.4702
IGKV1-6	1.4346e-13	5.8948e-17	3.7338		ID2-AS1	6.1215e-06	3.7822e-08	-2.2352
S100A8	2.8018e-13	1.2664e-16	3.8837		SPATA31E1	9.3038e-06	6.0402e-08	-2.5568
SOX14	5.0601e-13	2.495e-16	4.4438		MT1F	1.3136e-05	9.0141e-08	-1.9215
CXCR1	6.0099e-13	3.2103e-16	4.089		CYP2D6	1.33e-05	9.1813e-08	-2.2379
S100A9	8.9841e-13	5.1681e-16	3.634		SLC14A2	1.5177e-05	1.0602e-07	-2.2465
TREM1	1.1653e-12	7.3097e-16	3.8268		ALDOC	1.7777e-05	1.2787e-07	-1.9173
IL1RN	1.1653e-12	7.6613e-16	3.1267		TPPP	2.5639e-05	1.9685e-07	-1.7122
CXCL1	6.086e-12	4.2512e-15	3.3057		SMIM2-AS1	2.6646e-05	2.1131e-07	-1.9289
SLC11A1	7.5071e-12	5.5523e-15	3.4674		TMEM116	3.0498e-05	2.4562e-07	-1.151
NOS2	4.6044e-11	3.7839e-14	3.1504		CHDH	3.4614e-05	2.8446e-07	-1.425
IGKV1-17	5.0376e-11	4.3468e-14	3.1546		NMT2	3.5665e-05	2.9602e-07	-0.81402
CA2	6.0015e-11	5.6718e-14	3.1423		RHOBTB2	3.73e-05	3.1495e-07	-1.6192
LILRB3	6.0015e-11	5.4355e-14	2.6654		HACE1	4.2449e-05	3.7501e-07	-0.72946
MUC6	1.1456e-10	1.1298e-13	4.1388		RIMS2	4.8906e-05	4.3808e-07	-2.3024
IGKV1-5	1.7345e-10	1.7818e-13	2.8345		SLC5A11	5.1032e-05	4.5921e-07	-2.0652
LINC01272	2.9794e-10	3.183e-13	3.3096		TNNC2	5.2235e-05	4.7649e-07	-2.0166
FCN1	5.4446e-10	6.0404e-13	3.5077		FAM213A	5.5663e-05	5.1232e-07	-1.3868
IGHV3-21	5.9673e-10	7.1106e-13	3.1044		DNAH7	6.6723e-05	6.2783e-07	-1.8874
IGKV1-9	5.9673e-10	6.9496e-13	3.1231		CDHR1	6.767e-05	6.5342e-07	-2.2969
IGKV3-15	6.0602e-10	7.4704e-13	2.8994		CYP2B6	7.458e-05	7.3854e-07	-2.1248
IL1R2	6.0829e-10	7.7483e-13	2.9475		GRAMD1B	7.4826e-05	7.4405e-07	-1.4344
SLC7A11	1.1734e-09	1.5429e-12	3.0091		GS1-358P8.4	7.6405e-05	7.7208e-07	-1.2812
IGLV1-47	1.2893e-09	1.7482e-12	2.9083		PAQR5	8.0209e-05	8.2065e-07	-1.8558
LCN2	1.7801e-09	2.4869e-12	3.6065		PDK2	9.4731e-05	1.0157e-06	-1.3026
IGHV3-7	1.9638e-09	2.8242e-12	3.1782		SHBG	9.5062e-05	1.0312e-06	-2.6881
CLDN18	1.9745e-09	2.9207e-12	4.0239		TFEC	9.7506e-05	1.0657e-06	-1.2989
ASPHD2	2.6254e-09	3.9914e-12	1.898		MRO	0.00011172	1.2395e-06	-1.9622
IGLV10-54	3.0368e-09	4.7416e-12	2.7227		PLA2R1	0.00011819	1.3355e-06	-1.2768
CXCL5	3.159e-09	5.0623e-12	3.8776		ADAMTS17	0.00012685	1.449e-06	-1.3066
IGLV2-23	3.2998e-09	5.559e-12	2.5781		DTX4	0.00016644	1.9765e-06	-0.95504
IGHV1-18	3.2998e-09	5.4965e-12	2.906		TMTC4	0.00016966	2.0286e-06	-0.76404
IGHV4-34	3.6628e-09	6.3212e-12	2.9609		TRPM6	0.00016999	2.0395e-06	-1.9393
IGHV3-30	3.6637e-09	6.4732e-12	2.9503		THRA	0.00017342	2.095e-06	-0.77583
IL1B	3.9825e-09	7.2001e-12	3.1778		ASPA	0.00018246	2.2425e-06	-1.6347
IGKV3D-20	4.8644e-09	8.9945e-12	2.6745		CERK	0.00019618	2.4667e-06	-0.67885
IGKV3D-15	5.4544e-09	1.0534e-11	2.8276		SULT2A1	0.00022102	2.8364e-06	-2.4705
IGHV3-33	5.4762e-09	1.0801e-11	2.7217		EIF4EBP2	0.00022418	2.8924e-06	-1.2112
IGHV2-5	5.7045e-09	1.1485e-11	2.6116		GPR15	0.0002272	2.9594e-06	-1.6261
IGLV3-1	6.3137e-09	1.2971e-11	2.8104		MYOM3	0.00025765	3.4618e-06	-1.6437
GPT2	6.3986e-09	1.3409e-11	1.7998		FGF9	0.00026758	3.6283e-06	-1.2914
IGHV3-23	6.9786e-09	1.4911e-11	2.8352		MT2A	0.0002726	3.7299e-06	-1.35
DUOXA2	1.1628e-08	2.5322e-11	3.8649		MFI2	0.0003069	4.275e-06	-1.5738
SLC6A14	1.1884e-08	2.6368e-11	3.7423		QPRT	0.00031031	4.3352e-06	-1.2544
FPR2	1.4045e-08	3.1972e-11	3.3391		LRRN3	0.00031983	4.5301e-06	-1.9319
IGLV2-11	1.4045e-08	3.2318e-11	2.7568		C10orf99	0.00031983	4.502e-06	-2.0562
RNF183	2.0505e-08	4.8867e-11	3.2166		NBPF1	0.00031983	4.5339e-06	-1.2548
FPR1	2.0505e-08	4.8851e-11	2.8053		PGAP1	0.0003276	4.6709e-06	-1.0843
IGLV6-57	2.1919e-08	5.3137e-11	2.9273		NIPAL3	0.00034379	4.9897e-06	-0.76943
GRIN2D	2.4362e-08	6.0062e-11	2.8086		MPP6	0.00038761	5.7336e-06	-1.3266
IGHV3-73	2.761e-08	6.9204e-11	2.8624		PIGZ	0.00039942	5.974e-06	-1.5277
IGKV1-12	3.8357e-08	9.7716e-11	2.6546		PKLR	0.00039942	5.9578e-06	-1.8848
CAPN8	3.9529e-08	1.0233e-10	2.4972		MMEL1	0.00041371	6.2558e-06	-1.8869
PDX1	4.2413e-08	1.1154e-10	3.3129		GGT4P	0.00041852	6.3489e-06	-2.2617
MEFV	5.8592e-08	1.5649e-10	2.5581		GLS	0.0004302	6.5934e-06	-1.0772
CXCL10	5.9594e-08	1.6161e-10	2.6831		CLCN1	0.00045103	7.0053e-06	-1.9061
PYCR1	6.4857e-08	1.7855e-10	1.6975		GATM	0.00045654	7.1096e-06	-1.4465
IGHV4-39	7.2357e-08	2.0217e-10	2.7729		FLVCR1	0.00046694	7.3292e-06	-1.7795
IGHM	7.6974e-08	2.1824e-10	2.3918		HOXC11	0.00047075	7.4857e-06	-1.9663
STRIP2	7.9654e-08	2.2911e-10	2.3799		RP11-146N18.1	0.00047075	7.4476e-06	-2.6388
IGKV3-20	8.0788e-08	2.3569e-10	2.449		ABHD6	0.00048237	7.7299e-06	-1.3431
LILRA1	9.5159e-08	2.8934e-10	2.6596		EIF1AXP1	0.00048577	7.8506e-06	-1.6007
IGKV3-11	9.5159e-08	2.8687e-10	2.5127		ADD3	0.00049119	7.9723e-06	-0.84005
CXCL11	9.5905e-08	2.9555e-10	3.2482		DIRAS2	0.00049676	8.0831e-06	-2.0217
CXCL9	1.0765e-07	3.3616e-10	2.9603		AC005083.1	0.0005075	8.3204e-06	-1.1904
C5AR1	1.3712e-07	4.3382e-10	2.4235		APOM	0.00051121	8.4231e-06	-1.605
GPR84	1.5411e-07	4.9406e-10	2.8779		GAL3ST1	0.00051174	8.4529e-06	-1.5967
CLEC4E	1.5411e-07	5.0026e-10	3.027		GPAM	0.00053333	8.8972e-06	-0.76422
FCGR3A	1.721e-07	5.6572e-10	2.5021		ZADH2	0.00054543	9.1439e-06	-0.81893
IGLV4-69	1.827e-07	6.1559e-10	2.4773		CA7	0.0005751	9.7595e-06	-2.0124
IGHV1-46	1.827e-07	6.0996e-10	2.6925		RPS6KA5	0.0005985	1.023e-05	-0.89901
IGHV3-72	1.9429e-07	6.6263e-10	2.6504		SPTLC3	0.00061562	1.07e-05	-1.1514
ANXA10	1.975e-07	6.8168e-10	3.629		PRSS48	0.00063598	1.1108e-05	-2.3873
WARS	2.0205e-07	7.0567e-10	1.8149		GPR160	0.00065297	1.1483e-05	-1.0343
EGFL6	2.4006e-07	8.4831e-10	3.1759		RP11-1C8.4	0.00065702	1.1582e-05	-2.574
HCAR3	2.4304e-07	8.6881e-10	3.1243		FMO1	0.00068153	1.2129e-05	-2.3302
IGKV2D-28	2.4822e-07	8.9754e-10	2.4727		SLC23A3	0.00071164	1.2749e-05	-1.6218
ANO1	2.8073e-07	1.0266e-09	1.6375		PMM1	0.00072664	1.3078e-05	-0.95559
SAA1	3.0797e-07	1.1389e-09	3.441		PFN2	0.00074288	1.3507e-05	-1.3432
IGLV2-14	3.2517e-07	1.2159e-09	2.448		CRIP1	0.00074288	1.3483e-05	-1.2212
APOBEC3A	3.5758e-07	1.3517e-09	2.7958		U91328.19	0.00074288	1.3522e-05	-1.3825
C2CD4A	3.9491e-07	1.5091e-09	2.651		PMP22	0.00080556	1.4796e-05	-1.6025
CXCL2	4.2308e-07	1.6515e-09	2.9821		MT1E	0.00080746	1.4864e-05	-1.5151
PGC	4.2308e-07	1.6424e-09	3.5447		MGAT3-AS1	0.00082638	1.5348e-05	-1.5302
IGHV3-15	4.3104e-07	1.7003e-09	2.6204		FMO4	0.00083131	1.5474e-05	-1.1753
KCNJ15	4.5054e-07	1.7957e-09	2.8874		RP11-418I22.2	0.0008468	1.5832e-05	-1.9246
HIF1A	4.7114e-07	1.9165e-09	1.3225		GGT3P	0.00087152	1.6365e-05	-2.1885
PIM2	4.7114e-07	1.9142e-09	2.071		FAM172A	0.00087426	1.649e-05	-0.58015
CHI3L1	4.8951e-07	2.0114e-09	3.3392		MT1A	0.00087739	1.6728e-05	-1.718
CKAP4	4.9082e-07	2.0369e-09	1.1956		DHDH	0.00092235	1.7759e-05	-1.6823
IGKV1D-12	4.9529e-07	2.0758e-09	2.6722		PGPEP1	0.00092235	1.7733e-05	-0.91023
SERPINE1	5.294e-07	2.2405e-09	2.4243		ARHGAP35	0.00092235	1.7775e-05	-0.9586
IGKV2-28	5.4162e-07	2.3145e-09	2.5401		SOAT2	0.00092868	1.7935e-05	-1.9188
XBP1	5.4339e-07	2.3444e-09	1.5897		PHYH	0.00095302	1.846e-05	-1.1699
IGLV5-45	5.6769e-07	2.4726e-09	2.6714		LRAT	0.00095302	1.8483e-05	-2.1911
IGKV2-24	5.6944e-07	2.5036e-09	2.6543		SLC36A1	0.00095303	1.8522e-05	-1.5286
MCEMP1	5.7222e-07	2.5393e-09	3.1634		VSIG10	0.00096369	1.8809e-05	-1.2217
PRSS22	6.2391e-07	2.7944e-09	2.8343		PURA	0.00096369	1.8785e-05	-0.76136
TIMP1	6.8132e-07	3.0795e-09	1.7342		SEMA3E	0.0010484	2.0758e-05	-2.0604
AQP9	7.5019e-07	3.4565e-09	3.4498		GABRA2	0.001064	2.1247e-05	-1.5202
FCN3	7.5019e-07	3.4832e-09	2.9213		BST1	0.0010808	2.1672e-05	-1.4872
IGKV1-27	7.6958e-07	3.6049e-09	2.6079		LCN15	0.0010818	2.1736e-05	-2.2187
RBP4	7.8704e-07	3.7514e-09	2.7637		GRAMD1C	0.0011392	2.3077e-05	-1.3853
CXCL3	7.8704e-07	3.7342e-09	3.2093		SLC6A18	0.0011629	2.3738e-05	-2.1179
IGHV4-59	8.4937e-07	4.0834e-09	2.4735		SLC25A23	0.0011697	2.3934e-05	-1.2009
IGLV1-51	9.7121e-07	4.709e-09	2.4259		RP11-341D18.5	0.0011857	2.431e-05	-2.3686
BACE2	1.0094e-06	4.9358e-09	1.4262		PIWIL2	0.0012111	2.4883e-05	-1.0908
MMP1	1.1308e-06	5.5757e-09	2.7319		METTL24	0.0012745	2.6499e-05	-1.6661
IGLV2-8	1.2115e-06	6.0236e-09	2.4216		HNF1A-AS1	0.001308	2.741e-05	-1.4383
ITGAX	1.2738e-06	6.4381e-09	1.9535		CYP4A11	0.0013135	2.7634e-05	-2.0227
IGHV3-11	1.2738e-06	6.3882e-09	2.2661		PNLIPRP2	0.0013504	2.8521e-05	-1.7696
IGKV6-21	1.3704e-06	6.9824e-09	2.5714		AGO1	0.0013789	2.9236e-05	-0.75713
IGHV3-74	1.4104e-06	7.2442e-09	2.4634		WSCD1	0.0013885	2.9553e-05	-1.2795
GALNTL6	1.4397e-06	7.4798e-09	2.5079		C9orf24	0.001393	2.9707e-05	-1.6718
CTD-3088G3.8	1.4397e-06	7.5132e-09	2.2108		RMDN2	0.0013946	2.9799e-05	-0.96392
IGHV6-1	1.4507e-06	7.6298e-09	2.4606		ATE1-AS1	0.0013979	2.9984e-05	-2.2773
RP5-1031D4.3	1.6166e-06	8.5688e-09	2.6872		SAT2	0.0013981	3.0077e-05	-1.0727
MMP3	1.6171e-06	8.6379e-09	3.0814		COL2A1	0.0014338	3.0988e-05	-1.5327
HAS3	1.9715e-06	1.0612e-08	2.3154		RPS4XP8	0.0014373	3.1123e-05	-2.2327
IGLV1-40	2.4094e-06	1.3344e-08	2.1154		SLC5A9	0.0014725	3.2067e-05	-1.4941
IGLV3-25	2.4094e-06	1.3365e-08	2.202		ABCB1	0.0015059	3.2919e-05	-1.6462
IGKV1-16	2.4094e-06	1.3324e-08	2.4499		MAOB	0.0015108	3.3222e-05	-1.5696
MUC5AC	2.4231e-06	1.3541e-08	3.338		FRMD1	0.0015108	3.3157e-05	-1.8202
MLK7-AS1	2.493e-06	1.4034e-08	3.0209		SLC38A4	0.0015446	3.4272e-05	-1.7463
HK2	2.7003e-06	1.5312e-08	1.859		FAM168B	0.0015535	3.4598e-05	-0.5707
ADGRF1	2.9712e-06	1.697e-08	2.9808		SLC19A3	0.0016291	3.6482e-05	-1.4702
RASAL1	3.2788e-06	1.8862e-08	1.8796		GRIA4	0.0016584	3.7345e-05	-1.74
S100P	3.3788e-06	1.9575e-08	2.4487		RP11-521B24.3	0.0016584	3.7503e-05	-1.5809
RP13-870H17.3	3.8213e-06	2.2386e-08	2.5691		RP11-116O18.1	0.0016584	3.7652e-05	-1.9902
SMOX	3.8259e-06	2.2749e-08	1.6664		RP11-150O12.3	0.0016704	3.8035e-05	-1.6132
CCL28	4.1224e-06	2.49e-08	1.6038		SLC28A2	0.0017061	3.9203e-05	-1.8355
ALDH1A2	5.7539e-06	3.5227e-08	2.7751		BTNL2	0.0017354	4.0004e-05	-2.1307
HCAR2	6.1215e-06	3.8084e-08	2.4573		FAM151A	0.0017478	4.0432e-05	-2.1427
MIR3945HG	6.1215e-06	3.8232e-08	3.2163		XXyac-YM21GA2.7	0.0017478	4.0394e-05	-1.9145
CEACAM5	6.6567e-06	4.1849e-08	2.6979		EPHX2	0.0017654	4.1108e-05	-1.2179
SLC17A9	7.2245e-06	4.5716e-08	1.8975		HAGLR	0.0017654	4.1131e-05	-1.2101
MZB1	7.5143e-06	4.7858e-08	2.0195		SCIN	0.0017863	4.1689e-05	-1.5607
ANKRD22	8.5963e-06	5.5102e-08	2.0769		DPEP1	0.0017908	4.1916e-05	-1.8989
S100A12	8.6464e-06	5.5779e-08	3.1457		AC007126.1	0.0017946	4.2106e-05	-1.8565
RP11-16E12.2	9.3117e-06	6.0836e-08	2.3269		ACOX2	0.0017967	4.2228e-05	-1.2931
KRT7	1.0148e-05	6.6716e-08	2.8379		C1orf105	0.0017968	4.2305e-05	-2.1116
FFAR4	1.0342e-05	6.8419e-08	2.5452		LRIT2	0.00181	4.269e-05	-2.0952
DERL3	1.0345e-05	6.886e-08	2.0201		LIPE	0.0018349	4.3632e-05	-1.1723
HERPUD1	1.0815e-05	7.2437e-08	1.1261		TFDP2	0.0018349	4.3842e-05	-0.7225
TXNDC5	1.1677e-05	7.8691e-08	1.7469		TMEM220	0.0018349	4.3956e-05	-1.5455
HM13	1.1704e-05	7.9353e-08	0.97585		RP11-680F8.1	0.0018349	4.3578e-05	-1.6141
MANF	1.2819e-05	8.7438e-08	1.4475		SCN9A	0.001898	4.5623e-05	-1.4843
GBP5	1.3726e-05	9.5315e-08	1.9103		RP11-685B14.1	0.0019039	4.5842e-05	-2.2919
SLPI	1.6485e-05	1.1583e-07	2.433		MTND1P23	0.001907	4.5996e-05	-2.0646
TRNP1	1.7266e-05	1.2202e-07	2.0927		OSR2	0.0019647	4.7469e-05	-1.2572
GRHL1	1.7606e-05	1.2515e-07	2.2183		CTC-510F12.7	0.0019986	4.8369e-05	-2.1038
FGR	1.7777e-05	1.2723e-07	1.5859		ZP2	0.0020093	4.8862e-05	-1.8846
IGKV2-30	1.7777e-05	1.2929e-07	2.121		SMPDL3A	0.0020093	4.8806e-05	-1.4831
CLEC5A	1.7777e-05	1.2889e-07	2.9152		PLB1	0.0020953	5.1226e-05	-1.8574
NUCB2	1.8073e-05	1.3218e-07	1.1393		PDCD4	0.0021686	5.3197e-05	-0.73078
PDIA4	1.8933e-05	1.3925e-07	1.1319		SEMA5A	0.0022001	5.4061e-05	-1.2646
TNS4	2.0819e-05	1.5484e-07	2.2149		ANK3	0.0022038	5.4431e-05	-1.0532
IGLV8-61	2.0819e-05	1.5477e-07	2.3325		LINC01133	0.0022345	5.5456e-05	-1.3041
IGHV3-49	2.1373e-05	1.5984e-07	2.3986		PLEKHG6	0.0022524	5.5994e-05	-1.3093
IDO1	2.2398e-05	1.6842e-07	1.9416		GUCA2B	0.0023165	5.8233e-05	-2.1288
SLC2A1	2.2838e-05	1.7361e-07	1.8362		ACE	0.0023165	5.8254e-05	-1.6544
RP11-290F5.1	2.2838e-05	1.7282e-07	2.0003		TMEM192	0.0023165	5.8039e-05	-0.77351
IGKV4-1	2.5639e-05	1.9701e-07	2.0627		RP11-6B19.1	0.0023248	5.8654e-05	-2.3214
SULF2	2.5818e-05	1.9944e-07	1.1287		FN3K	0.0023299	5.8877e-05	-0.80727
TFF2	2.586e-05	2.0104e-07	2.9729		NR1H3	0.0023552	6.0096e-05	-0.70225
TFF1	2.586e-05	2.0189e-07	2.3072		ANKH	0.0023552	6.0024e-05	-0.74913
MNDA	2.595e-05	2.0366e-07	1.7386		STRADB	0.002361	6.0383e-05	-1.2024
PLA1A	2.6646e-05	2.1063e-07	2.2679		AGXT2	0.002361	6.0439e-05	-1.9812
LYPD6B	2.6874e-05	2.1422e-07	2.513		ZNF711	0.0024103	6.2393e-05	-0.6554
IGLV3-21	2.7786e-05	2.2263e-07	2.6258		AQP7	0.0024103	6.2379e-05	-1.4689
RP5-884M6.1	3.1794e-05	2.5736e-07	2.9048		CHP2	0.0024851	6.4739e-05	-1.3758
TPM4	3.225e-05	2.6238e-07	1.007		DNAJB5-AS1	0.0024962	6.5131e-05	-1.9552
STC2	3.4014e-05	2.7813e-07	2.3493		C1orf168	0.0026206	6.913e-05	-1.4947
RNF186	3.5437e-05	2.9267e-07	2.0112		ABCA8	0.0026237	6.9536e-05	-1.6275
PDZK1IP1	3.63e-05	3.0278e-07	2.0175		ADD3-AS1	0.0026237	6.9486e-05	-1.6279
IL1A	3.6825e-05	3.0867e-07	2.6271		PLOD2	0.0026255	6.969e-05	-1.3315
CRELD2	3.73e-05	3.1572e-07	1.3459		SLC26A3	0.0026277	6.9857e-05	-1.7843
STAT1	3.7513e-05	3.2061e-07	1.2485		NAAA	0.0026346	7.0149e-05	-1.3715
IGKV1D-39	3.7513e-05	3.1969e-07	2.0899		CYP46A1	0.0026358	7.0398e-05	-1.5285
IGKV3D-11	3.8062e-05	3.2687e-07	2.2602		TMEM252	0.0026358	7.0347e-05	-2.1481
MMP25	3.9443e-05	3.4359e-07	1.7846		ADRA1B	0.0026657	7.1416e-05	-1.8069
S100A11	3.9443e-05	3.4143e-07	1.645		GRIK2	0.0026755	7.1787e-05	-1.8102
C6orf141	3.9443e-05	3.435e-07	2.1726		FAM98C	0.0026996	7.2546e-05	-0.65553
HABP2	4.0412e-05	3.5369e-07	2.5753		RP5-1112D6.7	0.0028107	7.5878e-05	-1.6894
LGALS9	4.2237e-05	3.714e-07	0.98549		SAP30L	0.0028859	7.8314e-05	-0.93523
LILRB2	4.2816e-05	3.8001e-07	1.8401		RP11-21L19.1	0.0028872	7.8629e-05	-2.3188
MMP12	4.6801e-05	4.173e-07	2.392		KCNH6	0.0029242	8.0022e-05	-1.9091
IGHG2	5.107e-05	4.6165e-07	2.5089		MIEF2	0.0029285	8.0261e-05	-0.69564
MDFI	5.1518e-05	4.6782e-07	2.4104		PFKFB4	0.0029682	8.1837e-05	-1.2626
ADAMTS9	5.4929e-05	5.0332e-07	2.107		KL	0.0029682	8.1729e-05	-1.1303
IGKV1D-16	6.0458e-05	5.5894e-07	2.0732		CNGA1	0.0029883	8.2636e-05	-1.4111
IGLC3	6.1274e-05	5.69e-07	2.1629		PDLIM2	0.0029982	8.3035e-05	-0.97444
HSP90B1	6.183e-05	5.7671e-07	0.90443		F10	0.0031284	8.7155e-05	-1.4387
LPL	6.3014e-05	5.9035e-07	1.9529		VIPR1	0.003188	8.9076e-05	-1.0856
SPINK4	6.6883e-05	6.3556e-07	1.7084		PRKG2	0.0032159	9.0119e-05	-1.6981
SLC39A8	6.6883e-05	6.3347e-07	1.0387		ASB13	0.0032289	9.0617e-05	-1.0662
IGKV1-39	6.6883e-05	6.3758e-07	2.0504		ATP8A1	0.00326	9.1624e-05	-0.92066
PDE10A	6.7321e-05	6.4453e-07	1.8913		FOXO4	0.0032665	9.2073e-05	-0.84315
LITAF	6.767e-05	6.5329e-07	1.124		MUM1L1	0.0033009	9.3586e-05	-2.236
FER1L4	6.948e-05	6.7376e-07	2.0542		PRSS36	0.0033356	9.4706e-05	-1.1122
PIM3	7.3075e-05	7.1163e-07	1.1481		ALDH18A1	0.0033484	9.5758e-05	-0.89483
CFI	7.435e-05	7.2709e-07	1.8067		KLHL12	0.0033484	9.5704e-05	-0.46625
GBP1	7.4364e-05	7.3169e-07	1.363		CAPN13	0.0033484	9.5432e-05	-1.5334
MARS	7.4364e-05	7.3334e-07	0.89146		NAALADL1	0.0033747	9.6651e-05	-1.7378
TMEM45A	7.639e-05	7.6588e-07	1.6007		RP11-157L3.12	0.0033849	9.7233e-05	-2.2379
CD24	7.639e-05	7.6478e-07	1.7179		TMEM63C	0.0033859	9.7667e-05	-1.1385
FCGR1A	7.6405e-05	7.7231e-07	2.3706		CDK20	0.0033925	9.8276e-05	-1.3183
IKBIP	7.8456e-05	7.9626e-07	1.1359		PRODH	0.0035146	0.00010253	-1.6335
LUCAT1	7.9203e-05	8.071e-07	2.8185		RP11-43P8.2	0.003544	0.00010368	-1.7534
HS3ST1	8.0535e-05	8.2729e-07	1.248		TPRG1L	0.0036919	0.00010907	-0.87092
FAM83A	8.2077e-05	8.465e-07	2.1578		RP11-798K3.2	0.0037735	0.00011195	-1.6308
IRF1	8.2169e-05	8.5083e-07	1.0055		ABHD15	0.003783	0.00011239	-0.78416
CFP	8.3878e-05	8.7197e-07	1.7479		SLC7A7	0.0038515	0.00011489	-1.4513
TFAP2C	8.4769e-05	8.8652e-07	2.5935		AF127577.13	0.0038693	0.00011576	-2.1118
LILRA5	8.4769e-05	8.882e-07	2.2632		RP11-44F14.6	0.0038693	0.0001159	-1.3664
IGHV2-26	8.6491e-05	9.098e-07	2.2772		ALDOB	0.0038727	0.00011632	-1.4791
C15orf39	8.8402e-05	9.3428e-07	0.8665		AGAP1	0.0039004	0.00011748	-0.88878
RP11-689B22.2	8.8402e-05	9.3716e-07	2.1894		OAT	0.0039425	0.00011907	-1.4279
CLDN14	9.3293e-05	9.9284e-07	2.6566		RUNDC3B	0.0039895	0.00012098	-1.2524
BPIFB1	9.4731e-05	1.0197e-06	2.9001		FAM102A	0.0040307	0.00012247	-0.84083
FCGR2A	9.4731e-05	1.0217e-06	1.828		UCK2	0.0040577	0.00012355	-0.84054
TRIM69	9.4731e-05	1.0237e-06	0.87325		RNF217-AS1	0.0040651	0.00012394	-1.9289
DPY19L1	9.6969e-05	1.0559e-06	1.0516		ACAD10	0.0041294	0.00012641	-0.55957
ADGRE2	0.00010121	1.1103e-06	1.4123		C11orf54	0.0041294	0.00012637	-0.91178
LILRA2	0.0001063	1.1705e-06	1.9743		SLC25A34	0.004144	0.00012736	-1.2975
MTHFD2	0.00011172	1.2357e-06	1.2683		RP11-391L3.3	0.0041833	0.00012909	-2.0366
BATF2	0.00011619	1.2938e-06	1.3876		AGPAT3	0.0041877	0.00012944	-0.8418
IGLV3-10	0.00011687	1.3062e-06	2.2944		IREB2	0.0042409	0.00013156	-0.60102
RIPK2	0.00011819	1.3301e-06	1.2457		PHLPP2	0.0042785	0.00013291	-1.5144
GLT1D1	0.00011819	1.3337e-06	2.5485		PDZK1	0.0043036	0.00013404	-1.5824
KRT17	0.0001195	1.3552e-06	2.5447		NEDD4	0.0043141	0.00013472	-0.86997
S1PR5	0.00012685	1.4483e-06	2.0176		RP4-639F20.1	0.0043462	0.0001359	-0.8541
TMPRSS3	0.00012811	1.4782e-06	1.9256		TCN2	0.0044165	0.0001383	-1.4354
ASRGL1	0.00012811	1.4709e-06	1.2497		MXI1	0.0044319	0.00013931	-0.91495
PIGR	0.00012811	1.4792e-06	1.5089		PRLR	0.0044646	0.00014081	-1.3304
CD55	0.00013358	1.5478e-06	1.8708		AC004951.6	0.0045315	0.00014356	-1.8422
IGLV1-44	0.00013664	1.5889e-06	1.991		HDAC11	0.0045527	0.00014461	-0.81448
TNFAIP2	0.00015542	1.8137e-06	1.4474		ACSF2	0.0046422	0.00014852	-1.345
IGKC	0.00015852	1.8564e-06	1.8846		IL17RC	0.0046918	0.00015114	-0.77153
CXCL8	0.00016146	1.8974e-06	2.5867		AMN	0.004704	0.00015192	-1.2852
IGHG1	0.00016492	1.9449e-06	2.3256		CCDC175	0.0047116	0.00015255	-2.1797
IGHV5-51	0.0001658	1.962e-06	2.0319		HSD3B1	0.0047116	0.00015255	-1.9968
FCAR	0.00016806	2.0027e-06	2.4491		TMEM245	0.0047901	0.00015529	-0.65412
FBXO16	0.00017017	2.0488e-06	2.2089		TESK2	0.0048016	0.00015604	-0.8832
CHRDL2	0.00017594	2.1326e-06	2.3432		AC005550.3	0.0048016	0.00015606	-1.4516
PVRL4	0.00017969	2.1854e-06	1.8047		OSBPL6	0.0048101	0.00015654	-1.2147
MADCAM1	0.00018139	2.2211e-06	1.8489		ZNF704	0.0048769	0.00015931	-0.97906
MMP10	0.00018139	2.2179e-06	2.3809		TMEM56	0.0048835	0.00015973	-1.3576
IL11	0.00018246	2.2642e-06	2.6751		FAM73A	0.0048999	0.00016067	-0.97934
HAPLN3	0.00018246	2.2614e-06	1.8155		BEST4	0.0049762	0.00016439	-1.6269
PDK1	0.00018246	2.2582e-06	1.2564		CYP2U1	0.004991	0.00016529	-1.1856
CXCL6	0.00018275	2.2753e-06	2.3909		AC079779.4	0.005023	0.00016697	-1.6044
FJX1	0.00019607	2.4492e-06	2.0812		CACNA1D	0.0050285	0.00016736	-1.0715
IGKV2D-30	0.00019618	2.4646e-06	1.856		TRHDE	0.0050304	0.00016763	-1.5635
LAMP3	0.00019621	2.475e-06	1.721		CYP4V2	0.0050432	0.00016847	-0.97828
CEACAM3	0.00020128	2.5473e-06	1.9844		HTR1D	0.0050432	0.00016837	-1.4567
PSAT1	0.00020543	2.6082e-06	1.5937		BSN	0.0050776	0.00016983	-1.053
FOXQ1	0.00021606	2.761e-06	2.5719		TM4SF5	0.0051008	0.00017103	-1.3682
ACKR1	0.00021606	2.7522e-06	1.5846		DEGS2	0.0051008	0.00017088	-1.1896
IL20RA	0.00022102	2.8425e-06	2.1551		MSRA	0.0051074	0.00017152	-1.0073
NAMPT	0.00022425	2.9117e-06	1.3791		DIP2C	0.005213	0.00017629	-0.78144
IGHV3-13	0.00022425	2.9038e-06	2.4292		STAU2	0.0052367	0.0001773	-0.97945
ADGRE3	0.00022806	2.9843e-06	1.55		IGSF3	0.005284	0.00017955	-1.2618
PARM1	0.00022806	2.9894e-06	1.2614		LANCL1	0.0052912	0.00018002	-0.39466
ST6GALNAC4	0.00022875	3.0078e-06	1.1279		RAB3IP	0.0053415	0.00018283	-0.79673
CTB-61M7.2	0.00023847	3.1453e-06	2.7044		DPP4	0.0053444	0.00018315	-1.4972
SPAG4	0.00024061	3.1835e-06	1.5918		MROH2A	0.0053519	0.00018362	-1.8014
ALDH3A1	0.00024132	3.2028e-06	2.2292		TULP4	0.0054009	0.00018553	-0.98945
ACPP	0.00024794	3.3008e-06	1.8548		DBP	0.0054022	0.00018579	-0.9581
PRDX4	0.00024967	3.3342e-06	1.1939		FAM83F	0.0054404	0.000188	-1.0875
C2orf70	0.00025016	3.351e-06	2.552		CDHR2	0.0054917	0.00019045	-1.4239
PTAFR	0.00026448	3.5645e-06	1.4338		ANKRD27	0.0055762	0.00019515	-0.50994
OTUB2	0.00026637	3.6009e-06	1.582		PLA2G4C	0.0055762	0.00019521	-1.1263
SBNO2	0.00027042	3.6891e-06	0.84673		ERBB2	0.0055762	0.00019504	-0.98999
MUC4	0.00027042	3.6824e-06	2.0066		PTPRJ	0.0055762	0.00019453	-0.78813
VNN3	0.00027793	3.8143e-06	2.4674		TRAK1	0.0055762	0.00019487	-0.69889
TTC39A	0.00028903	3.9786e-06	1.4725		GSTM3	0.0055838	0.00019604	-1.0995
CDC25B	0.00029125	4.0211e-06	1.1829		RP11-77K12.5	0.0055838	0.00019617	-1.3597
TFPI2	0.00030495	4.2352e-06	2.2431		SLC25A15	0.0056215	0.00019819	-1.1599
IGLV4-3	0.00030495	4.2231e-06	2.6802		EEPD1	0.0056215	0.00019775	-0.99587
IGKV6D-21	0.00031303	4.386e-06	2.1605		CDKN2B-AS1	0.0056215	0.00019796	-1.7091
ANXA3	0.00031983	4.5169e-06	1.6677		NEURL3	0.005687	0.00020073	-1.3246
TMED9	0.00032543	4.6266e-06	0.8741		FRAS1	0.0056958	0.00020138	-1.3569
SLC38A5	0.00033241	4.7532e-06	1.272		GUCA2A	0.0056958	0.00020151	-1.8718
HK3	0.00033729	4.8507e-06	1.4873		BAIAP3	0.0057783	0.00020514	-0.966
CFAP58-AS1	0.00033729	4.8377e-06	2.3843		NOX5	0.0058086	0.00020651	-1.7049
G0S2	0.00034377	4.958e-06	1.7722		SLC22A4	0.0058602	0.00020901	-1.3801
LRG1	0.00034379	4.986e-06	1.6594		CMTM4	0.0058621	0.00020956	-1.054
CD177	0.00034379	5.0007e-06	2.4867		DNAJC16	0.0058644	0.00021094	-0.51529
ISG20	0.0003445	5.0359e-06	1.036		PGAP3	0.0058644	0.00021107	-0.82294
NQO1	0.0003445	5.0394e-06	1.5058		SLC22A5	0.0058644	0.00021006	-1.1315
PARP9	0.00035455	5.2009e-06	0.89478		DHRS7	0.0059904	0.00021637	-1.247
FKBP11	0.00036198	5.3248e-06	1.4316		GPR35	0.0059904	0.00021661	-0.9034
PYY2	0.0003671	5.4151e-06	2.321		PHF21B	0.0060708	0.00022051	-2.167
CARD16	0.00038807	5.7564e-06	1.0558		FAM189A1	0.0061204	0.00022307	-1.3111
MLKL	0.00039721	5.9083e-06	1.041		ACSS3	0.0061859	0.00022571	-1.181
FCGR1B	0.00040029	6.0034e-06	2.3511		CAMKK2	0.0062848	0.00023009	-0.52982
RNF145	0.00040486	6.0886e-06	0.85443		GDPD2	0.0063659	0.00023445	-1.5833
KRT42P	0.00040589	6.1208e-06	2.3374		PEPD	0.0064426	0.00023799	-1.3444
SEMA4A	0.00041852	6.3628e-06	1.4743		FOXD1	0.0064806	0.00023992	-1.7141
FFAR2	0.00042294	6.4474e-06	1.5806		RP11-375H19.2	0.0065129	0.00024165	-2.0117
ELL2	0.00042811	6.5438e-06	1.1145		SECTM1	0.0065822	0.00024504	-1.4718
ENAM	0.00044079	6.7739e-06	1.745		ERBB2IP	0.0066829	0.00024906	-0.94775
IGLC2	0.0004409	6.7937e-06	1.9051		LIN7A	0.0066911	0.00024964	-1.342
TNFAIP6	0.00044582	6.8878e-06	2.1893		FAM217B	0.0066956	0.00025033	-0.59312
NNMT	0.00045103	6.9974e-06	1.5547		C15orf40	0.0067023	0.00025089	-0.64877
ADGRG3	0.00046492	7.2785e-06	1.4882		RRAS2	0.0067344	0.00025264	-1.1046
IGKV1D-33	0.00046492	7.2628e-06	1.9118		GPX4	0.0068289	0.00025731	-0.84601
IGHV3-64	0.00046964	7.391e-06	2.3348		ZBTB7B	0.0068479	0.00025841	-0.85612
ZG16B	0.00047075	7.4728e-06	1.6712		FOXN3	0.0069266	0.00026213	-0.87197
CCR1	0.00047075	7.4541e-06	1.3131		TTC21B	0.006956	0.00026353	-0.58691
NCF2	0.00047458	7.5661e-06	1.4293		DFNA5	0.0069826	0.00026506	-1.5156
ONECUT2	0.00047641	7.615e-06	2.4418		ACADM	0.0069859	0.00026552	-1.0167
PILRA	0.00048364	7.7738e-06	1.2482		NKX1-2	0.0070088	0.00026697	-2.1517
KIAA0895	0.00048364	7.7901e-06	1.6738		DENND4C	0.0072249	0.00027756	-0.6584
AC104654.1	0.00048577	7.8643e-06	2.598		HSD17B11	0.0072716	0.00027967	-1.1688
NME1	0.00050652	8.2627e-06	1.6547		PMFBP1	0.0072837	0.00028043	-1.3734
IGHV3-48	0.00050661	8.2849e-06	2.0766		FAM200B	0.0073304	0.00028283	-0.57455
RP11-58O9.2	0.00050777	8.3457e-06	2.2632		DGCR6	0.0073693	0.00028494	-1.0175
UPP1	0.00052772	8.7386e-06	1.1913		MYOT	0.0073777	0.00028556	-1.3267
CRISP3	0.00053237	8.8376e-06	2.5239		FGD5-AS1	0.0073807	0.00028599	-0.4945
MAGED1	0.00053333	8.8875e-06	0.75862		AGBL2	0.0074533	0.00029006	-1.0931
MAPKAPK2	0.00054267	9.0754e-06	0.91925		SLC23A1	0.0074533	0.00029033	-1.592
GPR4	0.00054651	9.1844e-06	1.5838		C2orf88	0.0074533	0.00029024	-1.327
VSIG2	0.00055994	9.4562e-06	2.1377		NEURL1B	0.0074533	0.00028993	-0.96675
CEACAM4	0.00055994	9.4507e-06	2.4091		BPHL	0.0074554	0.00029072	-1.1533
EMILIN2	0.00057422	9.721e-06	1.1777		TDRD12	0.0075631	0.00029554	-1.6947
IGHV2-70	0.00057745	9.8232e-06	2.1664		LINC00476	0.0076634	0.00030018	-0.85265
C6orf223	0.00058339	9.948e-06	1.8455		NELL2	0.0076722	0.00030138	-1.4164
YARS	0.00060466	1.0361e-05	0.83831		PDE9A	0.0077116	0.00030324	-1.2163
PANX2	0.00060964	1.0471e-05	2.1258		MAST2	0.0077154	0.00030431	-0.72858
PDPN	0.00061171	1.0532e-05	1.8238		THNSL2	0.0077154	0.0003041	-0.97326
FBXO6	0.00061483	1.0614e-05	0.9425		PRAP1	0.0077275	0.00030514	-1.4429
SSR4	0.00061483	1.0649e-05	1.2319		RP11-707A18.1	0.0077449	0.00030646	-2.1425
LINC00152	0.00061483	1.0661e-05	1.5		ASTE1	0.0077705	0.00030811	-0.75601
PCDH17	0.00062674	1.0919e-05	1.643		KDM8	0.0077795	0.00030879	-1.1212
IGHV3-53	0.00063598	1.1132e-05	2.0566		CHRFAM7A	0.0077918	0.0003096	-1.4402
TMEM214	0.00064404	1.13e-05	0.68842		ERMP1	0.0078247	0.00031155	-0.59543
MIR4435-2HG	0.00066303	1.1715e-05	1.3592		OIT3	0.0078452	0.00031269	-1.4286
SRM	0.00066586	1.1792e-05	1.3849		DDC	0.0079829	0.0003206	-1.1423
WISP1	0.00066688	1.1838e-05	1.9242		TADA1	0.0079829	0.00032046	-0.43401
GLDC	0.00068153	1.2154e-05	1.7053		ZHX3	0.0079829	0.00032042	-0.88597
PROK2	0.00068627	1.2266e-05	2.5425		ABHD12	0.0080091	0.00032251	-0.91591
KRT16	0.00071705	1.2875e-05	2.5769		SNX12	0.008069	0.00032656	-0.79448
GMPPB	0.00072812	1.3134e-05	1.1218		SOS2	0.0080712	0.00032729	-0.69386
TCN1	0.00073355	1.3262e-05	2.5645		ZNF780A	0.0080712	0.00032733	-0.69325
CDH3	0.00076862	1.4023e-05	2.0838		SCMH1	0.0081445	0.00033167	-0.43628
SELP	0.00078886	1.4424e-05	1.6537		ATP9A	0.0081445	0.0003317	-1.0561
SLC7A5	0.00079264	1.4526e-05	1.5681		RXRA	0.0081923	0.00033481	-0.62549
GNA14	0.00081158	1.4973e-05	1.5191		SLC6A4	0.0082233	0.00033688	-1.7844
IGHA1	0.00081713	1.5109e-05	1.8285		BCHE	0.0082468	0.00033818	-1.542
SAA2	0.00082174	1.5228e-05	2.5678		ABCA5	0.0083297	0.00034192	-0.95141
CSF3	0.00083451	1.5567e-05	2.4845		SLC39A5	0.0083865	0.00034563	-1.1894
RP11-482G13.1	0.0008641	1.6191e-05	2.1565		B4GALNT2	0.0083865	0.00034531	-1.5943
TYMP	0.00087426	1.6525e-05	1.1014		RMND5A	0.0083878	0.00034672	-0.7934
APOL2	0.00087426	1.6519e-05	0.92135		MAPT	0.0083936	0.00034731	-1.3809
GSDMC	0.00087541	1.6582e-05	2.2504		ULK3	0.0084255	0.00034932	-0.93035
AKR1C1	0.00087691	1.6647e-05	1.8233		GTF2IP4	0.0087865	0.0003663	-1.0109
CALU	0.00087739	1.6726e-05	0.89693		CDC14A	0.0088207	0.00036854	-1.0442
RUSC2	0.00092196	1.7616e-05	0.88459		MIR621	0.0088894	0.00037403	-1.2897
PLEK	0.00092235	1.7742e-05	1.5801		TRPM7	0.0089048	0.00037687	-0.44789
FIRRE	0.00096449	1.8864e-05	2.3407		CLDN8	0.0089048	0.00037673	-2.1126
PGM2L1	0.00096585	1.893e-05	1.021		2020-03-02	0.0089179	0.0003778	-0.99187
WIPI1	0.0009879	1.9403e-05	0.70396		DNM1	0.0089202	0.00037826	-1.1989
TC2N	0.0010039	1.9759e-05	0.85805		MINOS1	0.0089658	0.00038093	-0.69051
GJA4	0.0010461	2.0632e-05	1.5777		NUDT14	0.0089737	0.00038163	-0.76554
DNAJC10	0.0010484	2.0763e-05	0.7096		CPNE2	0.0089945	0.00038326	-0.99221
GRHL3	0.0010543	2.0924e-05	1.7234		AP000344.3	0.0091073	0.00038881	-2.0154
IGFBP2	0.0010583	2.1046e-05	1.3865		SLC25A16	0.0091305	0.00039018	-0.63545
HYOU1	0.00106	2.1125e-05	0.79133		NCKIPSD	0.0091589	0.00039177	-0.56375
SSR3	0.0010659	2.1329e-05	0.81498		PANK3	0.0091852	0.00039327	-1.0226
PSTPIP2	0.0010917	2.1986e-05	1.0993		MAS1L	0.0091944	0.00039454	-2.008
CTHRC1	0.0010917	2.2026e-05	1.5334		FLJ22763	0.0091944	0.0003951	-1.4522
LYN	0.0011173	2.2588e-05	0.87014		CUBN	0.0092311	0.00039753	-1.9641
TESC	0.0011629	2.3665e-05	1.7249		HSD11B2	0.0092896	0.00040079	-1.041
NCOA7	0.0011629	2.3748e-05	1.242		INSR	0.0093599	0.00040421	-0.78287
SLC36A4	0.0011629	2.3743e-05	0.99617		ARPIN	0.0093854	0.0004057	-0.67594
FAM20A	0.0012253	2.5224e-05	1.4272		CHRM5	0.0094502	0.00040888	-1.5229
BHLHE40	0.0012263	2.5295e-05	1.4427		MS4A8	0.0095263	0.00041257	-1.4205
SMIM33	0.0012345	2.5515e-05	1.7509		WNK2	0.0096229	0.00041757	-1.0141
C19orf38	0.0012538	2.5965e-05	1.7462		RP11-631M6.3	0.0096229	0.00041794	-1.9791
CLCA4	0.0012559	2.606e-05	2.2833		GSTA2	0.0096946	0.00042265	-1.5108
CMTM6	0.0012805	2.6675e-05	0.65485		CKMT2	0.0097816	0.00042837	-1.351
SLCO4A1	0.0012995	2.7126e-05	1.2813		2020-03-08	0.0097816	0.00042802	-0.85158
CSF2RB	0.0013011	2.7212e-05	1.3845		SYNJ2BP	0.0098308	0.00043222	-0.72201
ACSL4	0.0013098	2.7502e-05	1.0248		PTPRF	0.0098524	0.00043357	-1.1293
CD59	0.0013272	2.7975e-05	1.0449		AC006927.5	0.0099547	0.0004389	-1.8021
FASN	0.0013553	2.8681e-05	0.71681		AHNAK	0.010012	0.00044235	-0.85669
TBX15	0.0013863	2.9449e-05	2.2379		HOXD1	0.010012	0.0004428	-1.3124
FICD	0.0013979	2.995e-05	1.0518		KCP	0.0101	0.00044779	-1.2728
PFKFB3	0.0013981	3.0103e-05	1.4316		CLCN5	0.010125	0.00044975	-1.1034
CLIC6	0.0014125	3.047e-05	1.3618		CAMK2G	0.010131	0.00045083	-0.64376
GARS	0.0014683	3.186e-05	0.83004		TCP10L2	0.010131	0.00045085	-1.497
IGHV1-69-2	0.0014683	3.1916e-05	1.9543		CROT	0.010172	0.00045309	-0.95152
C4BPB	0.0014746	3.2173e-05	1.7036		SORL1	0.010212	0.00045571	-1.0383
ITGA2B	0.0015108	3.3275e-05	1.7129		REEP6	0.010236	0.00045718	-1.3049
LRP8	0.0015108	3.3242e-05	1.2912		AOC1	0.010237	0.00045763	-1.3792
RAB3B	0.0015138	3.3405e-05	1.411		ABCA2	0.01028	0.00045999	-0.88657
RRM2	0.0015138	3.3463e-05	1.3725		DOCK1	0.0103	0.00046183	-0.68592
LILRA6	0.0015437	3.4189e-05	1.9015		CNTFR	0.010402	0.00046717	-1.848
SLC50A1	0.0015461	3.4368e-05	0.67868		NDN	0.010536	0.00047665	-0.73321
SH3BGRL3	0.0015605	3.4816e-05	0.94764		ADCY9	0.01064	0.00048268	-0.99532
IGKV5-2	0.0015763	3.5235e-05	1.9266		EXOC6B	0.010645	0.0004842	-0.95047
TSTA3	0.0016507	3.7034e-05	1.0581		RNASEL	0.010657	0.00048519	-0.58078
MMP19	0.001656	3.7221e-05	1.6437		ZNF91	0.010661	0.000486	-0.9169
IL4I1	0.0016584	3.7684e-05	1.4174		RP11-449O16.2	0.010661	0.00048626	-2.0673
CEP55	0.0016584	3.7664e-05	1.3112		SLC46A3	0.010667	0.00048696	-1.2354
LRFN4	0.0016584	3.7655e-05	1.0697		FAM47E	0.010725	0.00049092	-1.5294
ADAM12	0.0016704	3.8094e-05	1.5057		CNGA3	0.010742	0.00049216	-1.6977
HSPA5	0.001677	3.8314e-05	1.0026		UHMK1	0.010751	0.000493	-0.74637
CEACAM6	0.0016898	3.8675e-05	2.0866		NTPCR	0.010839	0.00049902	-0.63282
JSRP1	0.0016914	3.878e-05	1.7102		DAB1	0.010839	0.00049928	-1.5472
SLC29A1	0.0017061	3.9259e-05	0.93234		BMPER	0.010879	0.00050153	-1.2857
UBE2L6	0.0017532	4.0629e-05	0.74903		RAPGEFL1	0.010931	0.00050532	-1.0065
SDF2L1	0.0017549	4.0742e-05	1.2646		APPL2	0.010931	0.0005053	-1.0085
CCL20	0.0017908	4.1942e-05	1.9072		GOLT1A	0.011206	0.00051985	-1.2045
LYPD5	0.0018113	4.2795e-05	1.8685		MS4A15	0.011288	0.00052505	-1.6682
AGR2	0.0018349	4.3716e-05	1.5614		RP11-355B11.2	0.011412	0.00053271	-1.0668
F2RL2	0.0018349	4.3928e-05	1.8222		ACRBP	0.011489	0.00053675	-0.92
HSPD1P6	0.0018349	4.3805e-05	2.2821		SRCIN1	0.011674	0.00054733	-0.97448
TMEM158	0.0018349	4.3723e-05	1.5863		FMO5	0.011756	0.00055166	-1.1939
BID	0.0018715	4.491e-05	0.75904		FANCC	0.011778	0.00055366	-0.61992
TRIP6	0.0020093	4.8876e-05	1.0555		CTD-2184D3.3	0.011787	0.00055503	-2.0508
IGLV3-19	0.0020141	4.9076e-05	1.7221		PTPN3	0.011788	0.00055635	-0.98792
MTHFD1L	0.0020789	5.0739e-05	1.0269		SLC16A9	0.011788	0.00055652	-1.5592
NLRP7	0.002111	5.1697e-05	1.8865		DPP10	0.011939	0.00056463	-1.5667
F3	0.0022023	5.4237e-05	1.6589		CCNY	0.012008	0.00056839	-0.40668
RHBDL2	0.0022023	5.4295e-05	1.7473		AL033527.4	0.012023	0.00056961	-2.0334
FOXP3	0.0022038	5.4514e-05	1.8026		SLC17A4	0.012061	0.00057191	-1.1304
OSCAR	0.0022345	5.5425e-05	1.4224		RP11-17A1.3	0.012189	0.00057849	-1.8161
CD274	0.0022851	5.6899e-05	1.2676		SCTR	0.012265	0.00058357	-1.2656
MIR222HG	0.0022973	5.7299e-05	1.5309		MPP7	0.012265	0.0005833	-0.82803
ERLEC1	0.0023165	5.7892e-05	0.75088		NHSL1	0.012434	0.00059214	-1.0057
C2CD4B	0.0023165	5.8212e-05	1.5583		SNTA1	0.012467	0.00059476	-0.71408
PDIA5	0.0023248	5.8607e-05	0.82898		ROS1	0.012518	0.00059819	-1.4505
WDR62	0.0023305	5.8989e-05	1.0615		PGRMC1	0.012518	0.00059795	-1.0619
MUC5B	0.0023487	5.9545e-05	2.2864		MATN2	0.01253	0.00059982	-1.0352
STX11	0.0023551	5.9803e-05	1.3266		MAOA	0.012535	0.00060056	-1.3264
TACSTD2	0.0023552	6.007e-05	1.7048		FGFR3	0.012615	0.00060595	-0.97513
FOLH1B	0.002364	6.0614e-05	2.3596		HIF1AN	0.012615	0.00060542	-0.50558
IGHV3-43	0.0023696	6.0853e-05	1.896		RNU1-70P	0.012615	0.00060551	-1.5201
IFITM3	0.0023725	6.1123e-05	1.2644		SLC2A9	0.012661	0.0006092	-1.0883
TM4SF1	0.0023725	6.1053e-05	1.5488		SLC52A3	0.012707	0.00061195	-1.2705
CLEC12A	0.0023921	6.1727e-05	1.218		SLC13A2	0.012718	0.00061349	-1.4663
ARPC5L	0.0024272	6.2933e-05	0.69633		ADCY10	0.012718	0.00061297	-1.5464
ZYX	0.0024851	6.466e-05	0.66406		SNX24	0.012738	0.00061602	-1.0335
CCR3	0.0024851	6.4707e-05	1.4311		CTA-293F17.1	0.012807	0.00061991	-1.2405
AC016735.2	0.0025485	6.66e-05	2.3668		GNA11	0.012828	0.00062144	-1.0097
EPS8L1	0.0025642	6.7116e-05	1.2061		DHRS4	0.012954	0.0006286	-1.0573
ARNTL2	0.0025818	6.7788e-05	0.99842		DERA	0.013006	0.00063235	-0.94501
G6PD	0.0025818	6.7759e-05	0.66756		SMAD4	0.013009	0.00063393	-0.47876
PLAUR	0.0025871	6.8034e-05	1.7037		TMIGD1	0.013009	0.00063448	-1.7346
FAP	0.0025908	6.8239e-05	1.7629		RP11-96C23.9	0.013009	0.00063394	-2.0228
PPIF	0.0026206	6.9238e-05	0.96993		LGMN	0.013127	0.00064078	-1.0088
CACNA2D3	0.0026657	7.1399e-05	1.5073		MIR135A1	0.013136	0.00064177	-1.4477
IGHV1-3	0.0027486	7.3976e-05	2.0853		PDXP	0.013174	0.00064415	-1.1548
LAX1	0.0027713	7.4699e-05	1.4049		NPY6R	0.013204	0.00064616	-1.2703
THEMIS2	0.0028823	7.793e-05	1.1659		TRPV3	0.013215	0.00064724	-1.4011
MINA	0.0028823	7.8048e-05	0.81954		NR1I3	0.013285	0.0006523	-1.378
SHH	0.0028859	7.8383e-05	1.6428		ELMO3	0.013289	0.00065477	-0.76709
PRDM1	0.0028872	7.8653e-05	1.3377		FN3KRP	0.013289	0.00065389	-0.49826
SELE	0.0029198	7.9664e-05	2.1291		GPD1L	0.013289	0.00065454	-0.74408
SLC1A4	0.0029227	7.9862e-05	1.0859		SEPP1	0.013289	0.00065524	-1.458
TNFRSF4	0.0029352	8.0565e-05	1.426		PEX1	0.013333	0.00065852	-0.44237
LST1	0.0029412	8.0851e-05	1.1734		RP11-243A14.1	0.013333	0.00065853	-1.5481
NPC1L1	0.0029861	8.2453e-05	2.0776		PSMD5-AS1	0.013364	0.00066058	-0.97107
IGHV4-55	0.0030216	8.3805e-05	2.1798		ECI2	0.013461	0.00066703	-0.71174
CLDN1	0.0030707	8.5292e-05	1.9795		MTCO1P12	0.013471	0.00066809	-0.88716
PLAU	0.0030927	8.6031e-05	1.3722		TSHZ1	0.013473	0.00066875	-0.86307
IGLV7-46	0.0031796	8.8711e-05	1.5461		CAMK2N1	0.013489	0.00067065	-0.9363
PHKA1	0.0032	8.9544e-05	1.1743		CYB561D1	0.013489	0.00067035	-0.69218
TMEM165	0.0032607	9.1778e-05	0.76311		RP11-119D9.1	0.013571	0.00067529	-1.3744
DEFB124	0.0032779	9.2569e-05	2.1944		CYP2J2	0.013704	0.00068304	-1.3468
RP11-479G22.8	0.0032779	9.2667e-05	1.1865		AKAP6	0.013756	0.00068828	-0.85348
MYOF	0.0032989	9.3394e-05	1.2925		IGF2BP2-AS1	0.013756	0.00068769	-1.8086
IGLV3-27	0.0033463	9.5149e-05	2.0189		RHOU	0.013772	0.00069039	-1.2492
TRIM16	0.0033484	9.5754e-05	1.138		PLEKHA1	0.013803	0.00069363	-0.69549
FMO3	0.0033777	9.6875e-05	1.6092		PLA2G12A	0.013803	0.00069314	-0.66626
CLEC7A	0.0033849	9.7497e-05	1.4554		FOSL1P1	0.013893	0.00070021	-2.003
TMEM39A	0.0033849	9.7452e-05	0.55424		LINC01558	0.013923	0.00070309	-1.378
OSM	0.0033925	9.8222e-05	2.0873		CYBRD1	0.01405	0.00071009	-1.3576
BHLHA15	0.0033925	9.816e-05	1.6005		PUM2	0.014097	0.00071304	-0.45766
2020-03-03	0.0033997	9.8758e-05	1.0887		TM4SF4	0.014117	0.00071462	-1.5379
CTB-114C7.4	0.0033997	9.8764e-05	2.1856		ZDHHC6	0.01421	0.00072108	-0.62819
HCP5	0.0034279	9.9724e-05	0.68774		SSPO	0.01421	0.00072066	-0.94674
IGKV2D-24	0.0034971	0.00010188	1.8953		RP11-282K24.3	0.01421	0.00072048	-1.7326
TMED3	0.0035165	0.00010273	0.94741		TIRAP	0.014291	0.00072637	-0.61653
GNA15	0.0035957	0.00010542	1.317		GMCL1	0.01444	0.00073633	-0.66854
SPHK1	0.0035957	0.00010549	1.2408		CTD-2540B15.9	0.01444	0.00073606	-1.9174
IGKJ4	0.0036053	0.00010592	1.8038		SLC6A8	0.014559	0.0007436	-1.3139
IGKV2D-29	0.0036666	0.00010787	2.0755		VAPB	0.014641	0.00074839	-0.48677
MLH1	0.0036803	0.00010843	0.52106		SMPD3	0.014701	0.00075536	-1.0583
OASL	0.0036881	0.00010881	1.423		SCAP	0.014701	0.00075352	-0.38362
GBP1P1	0.0037137	0.00010988	1.694		TINAG	0.014701	0.00075497	-1.1502
RP11-650L12.2	0.0037137	0.00011002	2.1798		DNASE1	0.014729	0.00075834	-1.0913
TAP1	0.0038085	0.0001133	0.78172		C2orf68	0.014745	0.00075974	-0.64666
CLC	0.0038314	0.00011414	1.3882		PTPRD-AS1	0.014798	0.00076311	-1.5744
SULT1C2	0.0038693	0.00011566	1.5		GIPC2	0.014841	0.00076591	-1.0452
BUB1	0.0038727	0.00011622	1.2186		CTD-2515A14.1	0.014882	0.00076954	-1.6876
AUNIP	0.0038729	0.00011649	1.4432		EDN3	0.014898	0.00077254	-1.2917
RAB43	0.0039049	0.00011777	0.99268		SULT1A1	0.014942	0.00077723	-1.2463
NCAPH	0.0039426	0.00011923	1.1709		SUSD2	0.014946	0.00077812	-1.7056
LILRB4	0.0039458	0.00011949	1.4235		HNRNPA1P33	0.014946	0.00077872	-1.8203
IGHV1-58	0.0040307	0.00012256	1.9258		FAM161B	0.015022	0.0007833	-0.93425
TFCP2L1	0.0041144	0.00012561	1.8603		TMEM92-AS1	0.015098	0.00078913	-1.3559
IER3	0.0041382	0.00012702	1.6245		SGK223	0.015098	0.00078885	-0.83816
ACSL1	0.0041382	0.0001269	1.2518		PPARGC1A	0.015211	0.00079599	-1.1671
TOR3A	0.0041453	0.00012758	0.72386		RP11-491F9.3	0.015211	0.00079628	-1.73
RNF24	0.0041474	0.00012781	0.86477		AP3S2	0.01525	0.00079894	-0.58539
EIF2AK3	0.0041877	0.00012974	0.9275		ACBD4	0.01535	0.00080479	-0.85923
VARS	0.0041877	0.00012957	0.72382		SIRT5	0.015373	0.00080729	-0.42456
LAP3	0.0043036	0.00013391	0.82387		CTDSP1	0.015373	0.00080666	-0.38379
OLFML2B	0.0043047	0.00013425	1.3577		TDP2	0.015418	0.00081026	-1.1442
MSI2	0.0044165	0.00013846	0.68181		CTC-558O2.2	0.015477	0.000814	-1.9695
LYZ	0.0044319	0.00013926	1.4157		LEAP2	0.015825	0.00083834	-1.2901
IGHV3-66	0.0044485	0.00014002	1.8532		DAPK2	0.015867	0.00084169	-0.82101
NOL6	0.0044646	0.00014089	0.75785		CTD-2083E4.6	0.015879	0.00084297	-1.9299
TRPC4	0.0044997	0.00014218	1.7178		CCDC28A	0.015944	0.00084803	-0.71467
IL23A	0.0045117	0.00014275	1.347		C1orf115	0.015944	0.00084906	-1.2352
UNC13A	0.0045469	0.00014423	1.2096		LINC00511	0.015944	0.00084885	-1.0282
SPATS2	0.0045592	0.00014519	0.64251		HYKK	0.016003	0.00085353	-0.96996
SDCBP	0.0045592	0.00014501	0.80045		RP11-245G13.2	0.016003	0.00085313	-1.7717
ELFN1	0.0045781	0.00014598	1.3075		CCDC93	0.016034	0.00085687	-0.50323
DNAJC12	0.0045912	0.00014658	1.2287		NUDT16	0.016045	0.00085905	-0.74638
PLA2G7	0.0046422	0.00014859	1.5842		ZNF507	0.016054	0.00086156	-0.48591
CTA-384D8.36	0.004672	0.00014974	1.2455		RP4-799G3.2	0.016054	0.00086284	-1.9117
CD38	0.0046887	0.00015046	1.3734		BTBD9	0.016371	0.00088321	-0.6199
SEC61A1	0.0046918	0.00015102	0.6544		APPL1	0.016385	0.0008847	-0.65191
TRPV4	0.0046918	0.00015077	1.6221		LAMA1	0.016432	0.00088855	-1.1894
MAP7D1	0.004704	0.00015187	0.44493		MGAT4B	0.016501	0.00089337	-0.85628
HCK	0.0048226	0.00015714	1.118		RP11-274H2.2	0.016501	0.00089365	-1.9028
C10orf10	0.0048544	0.00015838	1.2085		DGCR2	0.016504	0.00089489	-0.58354
C2	0.0048967	0.00016036	1.0649		DPP6	0.016504	0.00089513	-1.5669
LDLRAD3	0.0049167	0.00016142	1.395		SLC25A1	0.016564	0.00089948	-0.80589
RP11-750H9.5	0.004947	0.00016282	1.4646		CCNG1	0.016607	0.00090278	-0.70713
ASIC5	0.004947	0.0001628	2.2182		RP11-400G3.3	0.016615	0.00090388	-1.9415
IFITM2	0.0049507	0.00016315	1.1561		NUDT19	0.016642	0.00090604	-0.51538
IGHV1-2	0.0049567	0.00016355	1.7314		SLC26A2	0.016685	0.00091047	-1.3457
B4GALNT3	0.0049814	0.00016477	1.1114		APOC3	0.016748	0.0009146	-1.7227
SLC4A11	0.0050124	0.00016641	1.6109		ASCL2	0.016772	0.0009166	-1.0746
CDC20	0.0050124	0.00016631	1.3839		C9orf40	0.016778	0.00091829	-0.84522
MAP3K6	0.0051074	0.00017167	0.96339		LGALS2	0.016801	0.00092071	-1.0067
RAMP3	0.0051646	0.0001738	1.3349		ACOT12	0.016801	0.00092094	-1.7291
KYNU	0.0051736	0.00017432	1.4587		RNF157	0.016808	0.00092201	-0.82024
IGLL5	0.005182	0.00017481	1.4959		NECAB3	0.016873	0.00092624	-0.55248
RP6-159A1.4	0.005213	0.00017629	1.7571		LINC01595	0.016959	0.00093307	-1.9395
TWIST1	0.0052749	0.00017881	1.825		KDSR	0.017027	0.00093953	-0.44983
SPCS2	0.005284	0.00017941	0.68157		LGR5	0.017077	0.00094378	-1.4986
JPH1	0.0053298	0.00018168	1.3725		TRAK2	0.017137	0.00094921	-0.60938
NT5DC2	0.0053298	0.00018177	1.1511		RP11-1069G10.1	0.017137	0.00094856	-1.4049
HSD11B1	0.0053335	0.00018233	1.82		GXYLT1	0.017149	0.00095057	-0.53899
CHAC1	0.0053335	0.00018225	1.5174		CTD-2132N18.2	0.017151	0.00095164	-1.1441
AC103718.1	0.0054061	0.00018615	2.1657		AUH	0.017155	0.00095303	-0.65651
PIF1	0.0054124	0.00018681	1.2322		TUBA3D	0.01721	0.00095747	-1.4367
PQLC2L	0.0054124	0.00018674	2.2025		COX10-AS1	0.017313	0.00096393	-0.69112
PML	0.0054881	0.00018999	0.55037		TMEM120A	0.01734	0.00096616	-0.93663
KIAA1024	0.0054881	0.0001901	1.4552		FGGY	0.017352	0.0009675	-0.74097
CAPN6	0.0054976	0.00019088	1.8396		CTC-558O2.1	0.017426	0.00097378	-1.5603
CREB3L1	0.0055369	0.00019247	1.1704		EPB41L4B	0.017443	0.00097547	-1.1879
FAM69A	0.0055762	0.00019509	0.78293		CYP27A1	0.017619	0.00098821	-1.0305
NOD2	0.005577	0.00019547	1.3611		SLC7A9	0.018099	0.0010189	-1.6085
EAF2	0.0057139	0.00020238	1.2562		RARS2	0.018199	0.0010259	-0.52858
DKK4	0.0057378	0.00020346	2.0372		DLG1	0.018202	0.0010269	-0.49919
ICAM1	0.0058086	0.00020669	1.4057		UGT2B29P	0.018268	0.0010344	-1.9348
IGLV9-49	0.0058233	0.00020745	1.7556		CDC14B	0.018297	0.0010375	-0.71795
ASGR1	0.0058613	0.00020929	1.2018		TMEM38B	0.018297	0.0010375	-0.57607
PPCDC	0.0058644	0.00021105	0.72975		LDLRAD4	0.018373	0.0010433	-0.68053
RUNX1	0.0058644	0.00021109	0.93371		BMP8B	0.018609	0.0010605	-1.1378
IGHV4-61	0.0058644	0.00021086	1.7812		IYD	0.018914	0.0010857	-1.3406
GPR3	0.0059326	0.00021379	1.919		GSTA1	0.018926	0.0010872	-1.3697
IARS	0.0059543	0.00021481	0.72208		GULP1	0.019034	0.0010951	-0.74828
LPCAT1	0.006033	0.0002184	0.93203		RP11-379B8.1	0.019034	0.0010965	-1.6326
IGHV2-70	0.0060337	0.00021867	2.1948		SLC13A1	0.019069	0.0011002	-1.8645
BCL2A1	0.0060361	0.000219	1.3439		THSD4	0.019069	0.0011009	-1.3725
EIF4EBP1	0.0060911	0.0002215	1.0541		RP11-807H22.5	0.019069	0.0011004	-1.8107
PNP	0.0061204	0.00022296	0.94177		CYB5A	0.01909	0.0011037	-1.0142
WFDC2	0.0061961	0.00022634	1.3698		ITLN2	0.019106	0.0011054	-1.3571
SRPRB	0.0062777	0.00022957	0.85053		SLC10A2	0.019196	0.0011126	-1.7532
TSHR	0.0062853	0.00023037	1.7133		RP11-480I12.5	0.019196	0.0011129	-1.0476
QPCTL	0.006296	0.00023102	0.73437		ANO5	0.019227	0.0011179	-1.1316
CCL17	0.0063105	0.00023181	1.8234		LINC00570	0.019227	0.0011174	-1.529
IFITM1	0.0063444	0.00023332	1.076		GNG4	0.019245	0.0011197	-1.5258
SHCBP1	0.0063659	0.00023463	1.1759		UROC1	0.019348	0.0011281	-1.9254
CPNE5	0.0063712	0.00023509	1.4344		CSMD3	0.019357	0.0011294	-1.8007
TMEM217	0.0064684	0.00023921	1.7481		HS1BP3	0.019497	0.0011416	-0.74958
APOL4	0.0065033	0.00024103	1.1806		ZSWIM5	0.019509	0.0011431	-0.91457
SEC11C	0.0065399	0.00024292	0.87413		ABCG2	0.019562	0.0011486	-1.3966
CEP128	0.0065613	0.00024399	0.96122		RP11-33N16.2	0.019614	0.0011535	-1.913
PTPN12	0.0066956	0.00025036	0.6307		LAMB4	0.019666	0.0011596	-1.367
IGKV1-33	0.0067298	0.00025219	1.5537		FRMD3	0.01973	0.0011642	-1.009
KLF2	0.0067767	0.00025451	1.1133		CLDN15	0.019739	0.0011678	-0.88404
ANLN	0.0067945	0.00025545	1.1223		DPY19L4	0.019739	0.0011679	-0.50282
PYGL	0.0068286	0.00025702	1.1387		PPARA	0.019739	0.0011657	-0.8404
COL9A2	0.0068479	0.00025859	1.1158		SOWAHA	0.019745	0.0011697	-1.2669
IGLV7-43	0.0068517	0.00025901	1.5423		GBA3	0.019745	0.0011699	-1.2029
DCC	0.0069826	0.00026511	1.8856		CHST6	0.019836	0.0011786	-1.2592
SPI1	0.0069863	0.00026582	1.2063		NDUFA6-AS1	0.019901	0.0011833	-1.1663
CASC19	0.0070335	0.0002682	1.8491		GGT1	0.019908	0.0011845	-1.0427
CEMIP	0.007036	0.00026858	1.4729		PTPRD	0.019958	0.0011891	-1.1396
REC8	0.0070361	0.00026887	1.0587		SEPHS2	0.019999	0.0011924	-0.91781
FCGR1C	0.0070419	0.00026938	2.0845		SEMA6A	0.02	0.0011949	-0.78244
ZBP1	0.0070574	0.00027027	1.2591		CYP4F2	0.02	0.0011934	-1.621
IRX3	0.0071919	0.00027572	2.123		XXyac-YM21GA2.4	0.020003	0.0011959	-1.5806
ANXA5	0.0072249	0.00027757	0.76873		CTDSP2	0.02006	0.0012009	-0.48212
AEN	0.0072987	0.00028131	0.96548		RP11-44N21.1	0.020078	0.0012034	-1.0819
ZNF628	0.0073693	0.00028468	0.65894		TIAM2	0.020204	0.0012137	-0.91158
HSPA4L	0.0074298	0.00028819	1.5512		RP11-503C24.6	0.020328	0.0012228	-1.6586
NAMPTP1	0.007464	0.00029136	1.5699		TMEM98	0.020516	0.0012383	-0.93865
IGFBP5	0.007637	0.00029874	1.5953		SULT1A2	0.020516	0.0012377	-1.1084
SLC16A14	0.0076634	0.0003004	1.2333		RP11-35P15.1	0.020547	0.0012417	-1.6002
B4GALT1	0.0076685	0.00030092	0.79023		CHST13	0.020575	0.0012445	-1.3868
C4B	0.0077154	0.00030434	1.4375		FCGRT	0.020615	0.0012477	-0.83685
SRMS	0.0077279	0.00030547	1.4328		INADL	0.0209	0.0012685	-0.69201
CTSL	0.0077585	0.00030732	0.99433		CES2	0.0209	0.0012693	-1.2109
RP11-439A17.9	0.0077977	0.00031015	2.0962		SMURF2	0.020937	0.0012749	-0.62325
TLR2	0.0079128	0.00031571	1.1503		SLC25A36	0.020937	0.0012729	-0.46505
SH3TC1	0.0079457	0.00031734	1.1131		SELENBP1	0.020937	0.0012747	-0.72206
ACTN1	0.0079829	0.00032087	0.90024		STAP2	0.020976	0.0012782	-0.82265
SOD2	0.0079829	0.00032075	1.0609		NLRP11	0.020976	0.0012791	-1.8239
LINC01559	0.0079829	0.00032112	2.0211		GCNT2	0.02098	0.0012805	-0.91422
IGLV3-16	0.0079829	0.00032052	2.1264		CMBL	0.021054	0.0012882	-1.1662
AC073072.5	0.0080191	0.00032324	2.1143		SCAPER	0.021058	0.0012901	-0.84923
BHLHE22	0.0080233	0.00032374	1.7417		TREH	0.021327	0.0013092	-1.4144
PLSCR1	0.0080514	0.00032521	0.71189		SVIP	0.021366	0.0013129	-0.46347
SLC1A5	0.008069	0.00032658	0.7713		SPAG5-AS1	0.021366	0.0013134	-1.104
TCIRG1	0.0081445	0.00033231	0.68509		BMF	0.021414	0.0013189	-0.85453
ECT2	0.0081445	0.00033231	0.99576		NBAS	0.021501	0.0013272	-0.64898
CARD6	0.0081445	0.00033182	0.90392		LINC00294	0.021501	0.001329	-0.9814
STK40	0.0081445	0.00033092	0.6564		SSUH2	0.021538	0.0013328	-1.3402
UBE2S	0.0081923	0.00033494	0.99168		CPOX	0.021545	0.0013373	-0.5088
HAVCR2	0.0082222	0.00033649	1.0343		RP11-229D13.3	0.021545	0.0013354	-1.356
KIF20A	0.008349	0.0003434	1.2503		MGAM	0.021569	0.0013427	-1.6112
LINC00162	0.008349	0.00034339	2.1178		GRIN2A	0.021608	0.001346	-1.2981
CEBPB	0.0083878	0.0003467	1.0726		SLC28A1	0.021662	0.001352	-1.4928
PDLIM7	0.0083878	0.00034645	0.98567		ZNF334	0.021662	0.0013517	-1.0762
PART1	0.0083967	0.00034778	1.9636		B3GALT5	0.021753	0.0013595	-1.1603
TMEM184B	0.0084642	0.00035127	0.50132		MPP5	0.021868	0.0013727	-0.95874
GAD1	0.0085946	0.00035703	2.046		AADAC	0.021868	0.0013714	-1.374
CTB-193M12.5	0.0086613	0.00036016	1.1254		GOLIM4	0.021868	0.0013708	-0.95202
UBE2J1	0.008748	0.00036413	0.67185		RP3-388M5.9	0.021868	0.0013724	-1.9009
YIF1B	0.0087865	0.00036645	0.84412		ABCD1	0.021892	0.0013781	-0.95337
CD300LF	0.0088207	0.0003686	1.1913		DDHD2	0.021947	0.0013824	-0.63946
ARSB	0.0088363	0.00036998	0.84821		FBXW4	0.021967	0.0013846	-0.43455
HSPA13	0.0088363	0.00036968	0.82464		RP11-727A23.5	0.021989	0.0013878	-0.96295
KCTD14	0.0088558	0.00037116	1.5593		SMC3	0.021998	0.0013899	-0.51723
PPP2R5B	0.0088595	0.00037168	0.49425		AP000344.4	0.021998	0.0013911	-1.7209
TROAP	0.008873	0.00037261	1.0897		RP11-415F23.3	0.02208	0.001399	-1.0981
SEC14L1	0.0088894	0.00037402	0.72003		DOPEY1	0.022106	0.0014025	-0.56468
IFI30	0.0088911	0.00037446	1.4984		NIPA1	0.022107	0.0014035	-0.48298
IFI6	0.0088924	0.00037506	1.0606		IL17RB	0.022185	0.0014102	-0.78884
FCRL5	0.0088924	0.00037525	1.4902		RP11-242G20.1	0.022194	0.0014117	-1.8919
ARHGAP1	0.0089048	0.00037655	0.34097		CYB5D2	0.022221	0.0014143	-0.55406
TNFRSF17	0.0089603	0.00038033	1.3491		SNHG18	0.022328	0.0014248	-0.85946
PSME4	0.0089945	0.00038322	0.54935		KHK	0.022395	0.0014309	-1.2514
ZNF267	0.0090683	0.00038677	0.98082		ATG4D	0.022427	0.0014339	-0.76547
VMP1	0.0091944	0.00039465	0.69929		MAPKBP1	0.02275	0.0014563	-0.70712
AC005077.14	0.0091944	0.00039517	1.7198		RORC	0.02275	0.0014564	-0.73868
BIK	0.0092033	0.00039593	1.2756		CD160	0.022843	0.0014658	-1.3095
SNRPGP10	0.0092311	0.00039789	1.3023		HAAO	0.022849	0.0014675	-0.87195
TPX2	0.009575	0.00041507	1.0722		PPL	0.022906	0.001473	-1.0781
IL17F	0.0096582	0.00042027	2.0945		CAPN7	0.022926	0.0014757	-0.42016
GNL2	0.0096582	0.00042026	0.61854		SLC34A3	0.022926	0.0014761	-1.6065
HTR1B	0.0096946	0.0004225	2.082		SLC44A5	0.023083	0.0014891	-1.6827
ADRM1	0.0097151	0.00042394	0.67367		NFRKB	0.023259	0.0015014	-0.4094
PLA2G3	0.0097693	0.00042671	1.8892		RP11-480I12.9	0.023313	0.0015068	-1.4277
PLS3	0.0097816	0.00042885	0.84359		ZNF33B	0.023456	0.001517	-0.60741
RNF182	0.0097816	0.00042845	1.9611		RP11-210M15.2	0.023522	0.0015223	-1.2673
ZC3H12A	0.0098003	0.00043007	1.1273		RMDN3	0.023565	0.001526	-0.94087
RPL24P4	0.0098255	0.00043158	1.6774		LIPC	0.023787	0.0015424	-1.5093
IGHA2	0.0098591	0.00043428	1.7519		SORBS3	0.023884	0.0015523	-0.65745
FNDC3B	0.010012	0.00044308	0.75732		RP11-177C12.1	0.023884	0.0015526	-1.0637
SFTPA2	0.010012	0.00044264	2.0322		GLTSCR1-AS1	0.023937	0.001557	-1.8651
TMEM200A	0.0101	0.00044758	0.80918		FLVCR2	0.023983	0.0015628	-1.0701
THBD	0.010106	0.00044847	1.361		OIP5-AS1	0.024077	0.001572	-0.51202
CARD14	0.010174	0.00045357	1.3095		SLC9A3R1	0.024092	0.001574	-0.97182
RP5-998N21.4	0.010299	0.00046129	2.0788		SMIM24	0.024245	0.001588	-1.2383
ALPL	0.0103	0.00046215	1.3531		XYLB	0.024273	0.0015938	-1.098
MRPL12	0.010413	0.00046811	1.1073		PGAM1P11	0.024273	0.0015933	-1.8651
RPN2	0.010484	0.00047342	0.65502		BRWD3	0.024412	0.0016064	-0.76508
FCER1G	0.010484	0.0004722	0.86227		TUBGCP4	0.024485	0.0016158	-0.54477
SERPINB9	0.010484	0.00047244	1.0981		ALDH6A1	0.024536	0.001623	-0.94588
CHST15	0.010484	0.0004726	1.1454		FADS6	0.024676	0.0016355	-1.6809
MROH6	0.010484	0.00047303	0.80426		IPP	0.024676	0.0016371	-0.49391
HSPA7	0.010535	0.00047618	1.3587		TRGV7	0.024676	0.0016375	-1.4024
C6orf58	0.010572	0.00047872	2.0736		MMP28	0.024676	0.0016366	-0.97872
PRCP	0.010604	0.00048058	0.86809		PHF7	0.024757	0.0016439	-0.73386
CDC42EP1	0.010644	0.00048373	0.77083		CRY2	0.025206	0.0016778	-0.74286
AC007386.4	0.010644	0.00048353	1.5579		RP11-269G24.6	0.025245	0.0016815	-1.587
UBE2D1	0.010712	0.00048946	0.65338		CTA-243E7.1	0.025313	0.0016883	-1.4315
USP14	0.010713	0.00048993	0.52316		SLC5A12	0.025402	0.0016992	-1.6307
PTPN1	0.010809	0.00049612	0.75323		EGFR-AS1	0.02547	0.0017048	-1.5762
R3HDM4	0.010824	0.00049726	0.67888		RP11-226L15.1	0.025498	0.0017078	-1.8642
ANK1	0.010839	0.00049885	1.1661		VAV2	0.025514	0.0017099	-0.6228
LAMC3	0.010924	0.00050406	1.5876		PIGS	0.025556	0.0017137	-0.72413
TEX41	0.010949	0.00050658	2.0439		WAC-AS1	0.025577	0.0017162	-0.56833
KCNE3	0.011124	0.00051512	0.94857		DNASE1L1	0.02565	0.0017285	-0.57515
MLN	0.011149	0.00051675	1.9521		PAOX	0.02565	0.0017264	-0.69677
SYVN1	0.011212	0.00052058	0.76089		TEF	0.02565	0.0017272	-0.96394
COL7A1	0.011287	0.00052452	1.5486		ATG2B	0.026052	0.0017655	-0.41186
NBN	0.011303	0.00052668	0.50233		KIAA1456	0.026052	0.0017663	-1.0305
P3H3	0.011303	0.0005262	0.7846		MAP3K2	0.026268	0.001782	-0.70685
PPIB	0.01132	0.00052794	0.87626		KCNJ3	0.026293	0.0017848	-0.99127
GTSF1	0.01149	0.00053729	1.5379		DMRTA1	0.026637	0.0018092	-1.5562
ME1	0.011544	0.00054025	1.0097		AIG1	0.026724	0.0018162	-0.72766
CYBA	0.011549	0.00054099	0.88786		IL32	0.026799	0.0018235	-0.80035
TMA16	0.011778	0.00055353	0.672		CDIPT	0.026845	0.00183	-0.55225
RP11-435I10.3	0.011787	0.00055468	2.0282		ZSCAN30	0.026845	0.0018299	-0.72208
PAQR4	0.011788	0.00055649	0.96057		LINC01123	0.026937	0.0018396	-1.1108
RAPGEF4	0.011884	0.00056155	1.0551		PLA2G12B	0.026942	0.0018419	-1.2989
CEACAM7	0.012243	0.00058155	1.9711		SMLR1	0.026983	0.0018461	-1.286
VSIG1	0.012461	0.00059394	1.9228		HEBP1	0.027148	0.0018596	-1.0594
MSC	0.012518	0.00059872	1.0934		REPS1	0.027189	0.0018635	-0.3273
SOCS1	0.012657	0.00060848	1.1336		LYRM7	0.027235	0.0018677	-0.45858
IL2RA	0.012723	0.00061426	1.282		CYP3A7	0.027369	0.0018837	-1.7512
DDX39A	0.012732	0.00061523	0.7075		F11-AS1	0.027369	0.0018834	-1.8242
SERPINB8	0.012918	0.00062632	0.94481		CRAT	0.027384	0.0018858	-0.8736
JCHAIN	0.012992	0.00063101	1.2863		PGRMC2	0.02744	0.0018919	-0.78942
RRP12	0.013006	0.00063274	0.79628		TCP11L2	0.027462	0.0018946	-0.7806
BATF3	0.013228	0.00064845	1.1399		ZNF350	0.02767	0.0019135	-0.47042
OGFOD1	0.013282	0.00065162	0.62435		MTMR4	0.027716	0.001919	-0.52932
RP11-320G24.1	0.013287	0.00065294	1.999		FAM213B	0.027716	0.0019183	-0.72037
ARMCX3	0.013382	0.00066203	0.51801		GLTP	0.027943	0.0019381	-0.63809
RP11-89C3.4	0.013399	0.00066342	1.992		WDR48	0.027961	0.0019405	-0.37709
TTL	0.013581	0.00067636	0.52474		FAM73B	0.027976	0.0019427	-0.60103
RP11-638I2.9	0.01373	0.0006849	1.7055		CDHR5	0.027999	0.0019492	-1.1537
OPN1SW	0.013756	0.00068843	1.1997		TBC1D13	0.027999	0.0019476	-0.64168
TUBG1	0.013756	0.00068678	0.82882		TRIM4	0.027999	0.00195	-0.40177
NCDN	0.013772	0.00068996	0.76882		ESPN	0.027999	0.0019489	-1.101
EPHA2	0.013781	0.00069138	1.4246		ZNF765	0.028232	0.0019709	-0.49263
RP11-46D6.1	0.013885	0.00069832	0.93318		FABP2	0.028252	0.0019781	-1.1191
C4orf32	0.013893	0.00070046	0.9924		PC	0.028252	0.0019776	-1.0319
SERPINB5	0.013893	0.00070006	1.3864		LINC00526	0.028252	0.0019761	-0.90726
RUFY4	0.013923	0.00070251	1.4828		MYOC	0.028293	0.0019833	-1.8384
NLRC5	0.01427	0.00072472	0.9301		PON3	0.028293	0.0019843	-1.1575
PLEKHH3	0.014306	0.00072773	0.80425		PDPK1	0.028293	0.0019845	-0.54594
GIMD1	0.014334	0.00072975	1.8408		P2RY1	0.028357	0.0019947	-0.87516
SRP72	0.014465	0.00073818	0.4595		OTOP2	0.028357	0.001994	-1.7236
TBXAS1	0.014701	0.00075277	0.90355		RABL6	0.028491	0.0020066	-0.42007
LY96	0.014701	0.00075498	1.1242		MMP24	0.028752	0.0020273	-1.2989
RAP2B	0.014701	0.00075567	0.91056		PTPRR	0.028813	0.0020357	-1.2284
KIAA0040	0.014701	0.00075235	0.88419		SLC9A6	0.028813	0.0020363	-0.75639
LRRC59	0.014729	0.00075787	0.89007		AP1AR	0.028824	0.0020383	-0.69174
BHLHE41	0.014879	0.00076851	0.95462		XCL1	0.028858	0.0020431	-1.1362
THY1	0.014882	0.0007705	1.2137		LINC00992	0.028917	0.0020516	-1.0977
SLC9A4	0.014882	0.00077006	1.9964		BAHCC1	0.028917	0.0020525	-0.6679
TRABD	0.014898	0.00077198	0.60232		DHRS11	0.028917	0.0020522	-0.95668
TMEM173	0.014898	0.00077315	0.88015		EVPL	0.028976	0.0020585	-0.9352
SLC6A12	0.014942	0.00077699	1.4913		PIPSL	0.028983	0.0020602	-1.4354
CYP2AB1P	0.014942	0.00077728	1.9967		ADPRHL1	0.029189	0.0020821	-0.85274
TRIM29	0.015098	0.00078801	1.5783		RP11-132E11.2	0.029292	0.002093	-1.6885
NMB	0.015513	0.00081652	0.95466		CTD-2085J24.5	0.029622	0.0021203	-1.5634
VCP	0.015529	0.00081932	0.49741		AR	0.029639	0.0021227	-1.2495
TTC16	0.015529	0.0008185	1.8494		FAM134A	0.029645	0.0021244	-0.46224
RUVBL1	0.015529	0.00081921	0.7903		CCDC85C	0.029666	0.0021271	-0.67971
HLA-F	0.015544	0.00082072	0.59613		SLC1A1	0.029705	0.0021311	-1.3099
SH3PXD2B	0.015636	0.00082622	0.90779		CDK6	0.029894	0.0021533	-0.58559
SRD5A3	0.015725	0.00083156	0.86713		RPL12P14	0.029894	0.0021532	-1.2939
SPCS2P4	0.015809	0.00083665	0.9373		LINC00330	0.029894	0.0021523	-1.7224
GAST	0.015825	0.00083882	1.9515		PPP2R2C	0.029936	0.0021612	-1.319
NANS	0.015937	0.00084669	0.73267		RMND1	0.029957	0.0021664	-0.61143
TXNDC11	0.016003	0.00085419	0.67764		CNKSR3	0.029975	0.0021695	-1.0668
SLAMF7	0.016034	0.00085768	1.1134		SLC5A7	0.03011	0.0021824	-1.5985
SRP68	0.016034	0.00085781	0.42605		ENPEP	0.030182	0.0021889	-1.5083
GPX8	0.016054	0.00086213	1.0934		CHAT	0.030222	0.0021931	-1.7067
ANKRD20A10P	0.016054	0.00086073	1.9816		IGSF23	0.030236	0.0021953	-1.3506
AL160272.1	0.016054	0.00086281	1.7022		KLRD1	0.030367	0.0022073	-1.0598
CSF2	0.016117	0.00086687	1.589		DYRK2	0.030377	0.0022093	-0.85787
CCL22	0.01622	0.00087307	1.3348		PGAP2	0.030466	0.002217	-0.56012
TNFRSF8	0.016309	0.00087923	1.4457		PADI2	0.030582	0.0022279	-1.234
ITLN1	0.016309	0.00087883	1.413		TKFC	0.030637	0.002234	-0.91934
SKA1	0.016385	0.00088531	1.191		ACSF3	0.030637	0.0022345	-0.50559
WBP5	0.016564	0.00089979	0.82829		RP11-15F12.1	0.030683	0.0022391	-1.4204
MYDGF	0.016668	0.00090818	0.86459		KANK1	0.030763	0.0022462	-0.46528
QPCT	0.016676	0.00090928	0.85031		ANKRD46	0.030814	0.0022525	-0.60793
CTLA4	0.016778	0.00091815	1.5138		CDKN2B	0.030826	0.0022546	-1.1361
KCNN3	0.016882	0.00092746	1.1609		SFT2D2	0.030964	0.002266	-0.56068
ENTPD3	0.016915	0.00092997	1.4842		SEMA3B	0.030968	0.0022713	-0.86864
GCA	0.016991	0.00093551	0.57666		NSRP1P1	0.030968	0.0022708	-1.8051
JAK2	0.017027	0.0009396	0.47684		TK2	0.031277	0.0023019	-0.50834
HCN2	0.017027	0.00093931	1.3271		FAM109A	0.031277	0.0023043	-0.90855
PLK1	0.017077	0.00094354	1.1251		GIT1	0.031621	0.002333	-0.34441
FAM46C	0.017134	0.0009476	0.94661		NOVA1-AS1	0.031621	0.0023335	-1.7952
C20orf24	0.017151	0.0009521	0.81074		GGTLC5P	0.031962	0.00236	-1.8081
PLEKHG2	0.017177	0.00095494	0.96467		IGBP1	0.032003	0.0023644	-0.5898
B9D1	0.017367	0.00096907	1.2085		GPRIN2	0.032007	0.0023659	-1.0481
ARHGAP11B	0.017421	0.00097282	0.8212		LHPP	0.032101	0.0023755	-0.68782
TNFRSF9	0.017451	0.00097661	1.2969		RP11-515O17.2	0.032168	0.0023832	-1.7766
UAP1L1	0.01752	0.00098119	0.84214		ENPP5	0.032174	0.0023849	-0.9929
ABCA4	0.017528	0.00098237	1.3159		RP11-364L4.1	0.032203	0.0023884	-1.7427
IGLV3-12	0.017756	0.00099661	1.9559		SOX6	0.032222	0.0023924	-1.0686
HNRNPA1P21	0.017859	0.0010031	1.81		CEACAM18	0.032228	0.0023956	-1.2189
CSGALNACT1	0.017872	0.0010046	0.99025		HNF4A-AS1	0.032264	0.0023996	-1.5365
SEC23B	0.017932	0.0010087	0.594		MUC19	0.032427	0.002413	-1.5609
FAM26F	0.018199	0.001026	1.3359		CALR4P	0.032506	0.0024216	-1.3245
IRF4	0.018242	0.0010299	1.0527		BEND7	0.032548	0.0024274	-0.99352
UNC13D	0.018247	0.0010309	0.87645		UBAC2	0.032644	0.0024359	-0.38495
RSU1	0.018255	0.0010322	0.51194		PTGR1	0.032724	0.0024445	-1.0361
HK1	0.018255	0.0010329	0.79818		2020-03-06	0.032724	0.0024436	-0.47208
KRT72	0.018344	0.0010409	1.5882		LINC01413	0.032755	0.0024482	-1.7492
OLIG1	0.01838	0.0010445	1.6846		ESRRG	0.032806	0.0024534	-1.156
GBP4	0.018461	0.0010498	1.0236		ZZEF1	0.032996	0.0024729	-0.75248
ZNF185	0.018609	0.0010605	0.93508		SH2D7	0.033028	0.0024767	-1.3927
LINC01484	0.018609	0.0010605	1.9321		ABAT	0.033039	0.0024789	-0.97513
NUP93	0.01862	0.0010619	0.6429		NBL1	0.033131	0.0024885	-0.73959
CTSE	0.018707	0.0010677	1.6833		CNTN4	0.033281	0.0025026	-0.88554
KIF18B	0.01872	0.0010692	0.99918		PEX26	0.033313	0.0025077	-0.80515
DZIP1L	0.018741	0.0010711	0.92221		NLRP9	0.033315	0.0025092	-1.483
CDV3	0.018836	0.0010773	0.56587		VPS13D	0.033358	0.0025167	-0.41136
MLPH	0.018846	0.0010787	1.0389		LRRC28	0.033369	0.0025201	-0.72153
ODF2	0.018914	0.001085	0.52672		KAT2B	0.033381	0.0025224	-0.67785
CLEC4D	0.018914	0.0010846	1.8013		DGKQ	0.033398	0.0025251	-0.49481
LINC01348	0.018914	0.001084	1.2555		ARHGAP18	0.033482	0.0025353	-0.69125
COL4A1	0.019029	0.0010939	1.2195		FAM132A	0.033482	0.0025341	-0.9247
A4GNT	0.019034	0.0010961	1.9295		ZDHHC11B	0.033482	0.0025368	-1.2508
LZTS1	0.01909	0.0011035	1.2451		SPATA31C1	0.033482	0.0025383	-1.5906
GNL3	0.01915	0.0011087	0.63898		RP11-432I5.8	0.033482	0.0025375	-1.5976
ODC1	0.019201	0.0011145	1.0449		NAT8B	0.033565	0.002546	-1.545
DIAPH3	0.019201	0.0011148	1.167		ZNF395	0.033586	0.0025489	-0.67935
CLCF1	0.01928	0.0011226	0.99585		MS4A10	0.033645	0.0025562	-1.5548
PSMB8	0.019346	0.0011272	0.6454		ERVW-1	0.033645	0.002556	-1.48
QSOX1	0.019391	0.0011322	0.85929		ERBB3	0.033659	0.0025586	-0.89002
WNT5A	0.019404	0.0011338	1.4319		SAXO2	0.033664	0.0025604	-1.4785
CA9	0.019423	0.0011365	1.4189		SARM1	0.03379	0.0025797	-0.51855
CBX2	0.019423	0.001136	1.1796		PAAF1	0.03387	0.0025915	-0.45177
SAMD9L	0.019551	0.0011464	0.83329		KLHL24	0.03404	0.00261	-0.6393
IGKV2D-40	0.019562	0.0011485	1.7374		PDK3	0.034061	0.0026144	-0.74123
PGLYRP1	0.019614	0.0011547	1.388		EIF4E3	0.034176	0.0026246	-0.71846
ADCYAP1	0.019614	0.0011542	1.7612		CNDP2	0.03433	0.0026491	-0.91904
AC072022.2	0.019614	0.0011549	1.5528		RP11-513M16.8	0.03433	0.0026496	-1.2328
SRA1	0.019666	0.0011594	0.65507		TMEM92	0.034496	0.0026705	-1.008
GPR180	0.019739	0.0011676	0.54531		PBLD	0.034722	0.0026908	-1.1244
TXNDC15	0.019796	0.001174	0.6178		HPS1	0.034739	0.0026949	-0.40566
ANXA2	0.019796	0.0011753	1.0732		RP11-944C7.1	0.034739	0.0026939	-1.5307
RP11-219G17.4	0.019796	0.0011754	1.6206		FAT3	0.035129	0.0027395	-1.2032
RPL39L	0.019935	0.0011869	1.3039		PTPN9	0.035129	0.002737	-0.59671
HJURP	0.02	0.0011941	1.0999		FAAH	0.035137	0.0027431	-0.62057
ACOXL	0.020029	0.0011983	1.5392		IGSF9	0.035312	0.0027608	-1.2453
IGKJ5	0.020078	0.0012045	1.5553		ACADS	0.035312	0.0027586	-0.8325
MIR155HG	0.020078	0.0012043	1.3765		RP11-627G23.1	0.035449	0.0027763	-1.157
AKIRIN2	0.020091	0.0012061	0.55874		STK17B	0.035474	0.0027797	-0.6358
KIF2C	0.020216	0.0012153	1.0801		RAB40C	0.035536	0.0027874	-0.55355
CD86	0.020345	0.0012247	1.062		AK4P1	0.035554	0.0027905	-1.6357
NRROS	0.020476	0.0012334	1.1149		CTD-2396E7.11	0.035554	0.0027918	-0.92806
CDCA2	0.020512	0.0012364	1.0353		KIDINS220	0.035635	0.0028011	-0.33896
SAP30	0.020547	0.0012419	0.79545		SGPL1	0.035635	0.0027996	-0.71337
IL6	0.020692	0.0012541	1.8758		CIPC	0.035685	0.0028073	-0.56875
CX3CR1	0.020692	0.0012533	1.3186		FCF1P7	0.035768	0.0028159	-1.7735
LRRC25	0.0209	0.0012684	1.0987		AMIGO1	0.036058	0.0028461	-0.78711
ADGRG1	0.020937	0.0012742	0.66895		NUDT16P1	0.036089	0.0028501	-0.76607
PMAIP1	0.02098	0.001281	1.1918		BDH2	0.036094	0.002852	-0.88696
FBXW7	0.021046	0.0012868	0.66294		RITA1	0.03611	0.0028563	-0.79652
C18orf65	0.021046	0.0012863	1.914		ZNF768	0.036439	0.0028853	-0.53788
TLE1	0.021058	0.0012901	0.73792		GDAP2	0.036439	0.0028867	-0.47492
IL15RA	0.021085	0.0012926	0.65004		TMEM236	0.036616	0.0029098	-1.0831
AMPD2	0.021095	0.0012941	0.54066		APOA1	0.036715	0.0029192	-1.6376
CSTA	0.021369	0.0013144	1.3475		IGFBPL1	0.036781	0.0029274	-1.6669
ERN2	0.021392	0.0013167	0.78338		BHLHB9	0.036918	0.0029444	-0.72465
DLGAP1-AS5	0.021481	0.001324	1.8973		DEFB1	0.036941	0.0029489	-1.4136
PDGFRL	0.02149	0.0013254	1.3559		MYO1A	0.036975	0.0029535	-1.0945
CYP2E1	0.021501	0.0013296	1.3391		PAG1	0.036982	0.0029571	-0.75653
CENPU	0.021501	0.0013292	0.88291		PAPSS2	0.036987	0.0029591	-0.94077
IL4R	0.021545	0.0013359	0.57011		RP11-1275H24.3	0.03706	0.0029679	-1.6029
GCKR	0.021545	0.0013391	1.7441		AC127035.1	0.03706	0.002967	-1.7367
HILPDA	0.021545	0.0013394	1.2262		KCNJ16	0.037069	0.002973	-1.2316
AGTRAP	0.021545	0.0013393	0.84806		PTTG1IP	0.037092	0.0029766	-0.72984
LINC01270	0.021545	0.0013347	1.8523		MYZAP	0.037136	0.0029816	-0.99876
MEI1	0.021563	0.0013414	1.1562		LYRM5	0.037163	0.0029854	-0.51674
CKAP2L	0.02166	0.0013501	1.0016		SLC25A42	0.037166	0.002987	-0.67637
ENG	0.021662	0.0013529	1.0062		TSNARE1	0.0372	0.0029913	-0.7007
HGF	0.021868	0.0013734	1.3719		FMR1-IT1	0.037321	0.0030072	-1.6002
FEN1	0.021868	0.0013698	0.97413		TCP11L1	0.037328	0.0030093	-0.82779
ZSCAN12P1	0.021868	0.0013739	1.4449		RP11-274A11.3	0.037459	0.0030214	-1.7046
IGKV3OR2-268	0.021868	0.0013685	1.6827		NALCN	0.037462	0.0030232	-1.3611
F5	0.021873	0.0013751	1.1888		GDPD1	0.037488	0.0030284	-0.95444
USP35	0.021875	0.0013761	0.64996		SPIN1	0.037613	0.003044	-0.49821
DTYMK	0.02197	0.0013857	0.97414		SLC35A5	0.037613	0.0030447	-0.58071
SLC16A1	0.021998	0.0013902	0.75852		MGC32805	0.037659	0.0030499	-1.4
MPP3	0.021999	0.0013921	0.92879		SLC30A4	0.037892	0.0030781	-0.89787
NINJ2	0.022057	0.0013967	0.98549		AP000439.3	0.037937	0.0030849	-0.95351
CPLX1	0.022094	0.0014008	1.1047		HOXA5	0.038039	0.0030982	-0.9445
RP11-467L13.7	0.022185	0.00141	0.90267		MYH15	0.038039	0.0030994	-0.97599
CCDC167	0.022245	0.0014177	0.98173		TGFBR3L	0.038039	0.0030963	-1.1569
RP11-638I2.10	0.022245	0.0014171	1.8639		ACVR2A	0.038076	0.0031041	-0.78255
CCNF	0.022301	0.0014222	0.92837		DOCK5	0.038306	0.0031275	-0.76956
FAM92B	0.022364	0.001428	1.7355		ACACB	0.038453	0.0031411	-0.49418
CCL26	0.022777	0.0014591	1.8227		HRASLS2	0.038494	0.0031492	-1.1265
CECR1	0.022843	0.0014661	0.96411		TMEM125	0.038646	0.0031657	-0.83257
IGHG3	0.022843	0.0014653	1.6882		PEBP1	0.03868	0.003173	-0.84082
WNT5A-AS1	0.022904	0.0014719	1.7134		ABO	0.03868	0.003173	-0.98011
GM2A	0.022947	0.0014785	0.65843		SEZ6L	0.038687	0.0031773	-1.3738
ADRA2C	0.023033	0.0014849	1.4135		NR6A1	0.038767	0.0031858	-0.84476
GKN2	0.023307	0.0015054	1.8719		ABCD3	0.038929	0.0032037	-0.87146
SRGN	0.02378	0.0015409	0.90815		AC073283.4	0.038965	0.0032085	-0.96993
FTSJ1	0.023811	0.0015449	0.71498		SORT1	0.039044	0.0032166	-0.87972
CCDC86	0.02383	0.0015471	0.64772		TOLLIP	0.03905	0.0032215	-0.47316
STK39	0.023938	0.001558	0.56687		CDK18	0.039067	0.0032249	-0.64546
CCR8	0.023983	0.0015629	1.7286		ABHD14B	0.039072	0.0032286	-0.53948
PDCD1LG2	0.024055	0.0015686	1.1742		CRIPT	0.039093	0.0032344	-0.56528
VSNL1	0.024057	0.0015697	1.7364		RALGAPB	0.039093	0.0032351	-0.39811
SIX1	0.024108	0.0015761	1.7795		LRRC29	0.039153	0.0032443	-0.97708
REG3G	0.024158	0.0015803	1.495		AMOT	0.039153	0.003245	-0.70021
AURKA	0.024222	0.0015855	0.99101		GFOD2	0.039153	0.0032432	-0.31505
IQCG	0.024273	0.0015928	0.74039		FABP6	0.039153	0.0032481	-1.5656
MMP13	0.024273	0.0015918	1.5188		CYP1B1-AS1	0.039153	0.0032467	-1.1783
CPZ	0.024312	0.0015974	1.8768		FMR1	0.039219	0.0032552	-0.47239
DYSF	0.024409	0.0016047	1.0901		TMEM25	0.039244	0.0032701	-0.96638
TAS1R3	0.024412	0.0016069	1.2579		RP1-240K6.3	0.039244	0.0032645	-1.4796
FAM43A	0.024415	0.0016081	1.0206		TMED4	0.039382	0.0032882	-0.68919
MELK	0.024419	0.0016094	0.93083		RNF151	0.039413	0.0032924	-1.7162
GPAT2	0.024427	0.001611	1.3781		RP11-132F7.2	0.039761	0.0033247	-1.1937
EPHX3	0.024509	0.0016184	1.554		MLXIPL	0.039876	0.003336	-1.018
SEMA6B	0.024523	0.0016203	1.1229		PNCK	0.039894	0.0033391	-1.3868
NPDC1	0.024536	0.0016232	0.80463		SSTR1	0.040048	0.0033588	-0.98797
TFAP2A	0.024611	0.0016292	1.6144		CSRP2BP	0.040048	0.0033562	-0.56984
ATAD3A	0.025107	0.0016681	0.44795		HOXA3	0.040221	0.0033812	-0.76648
SCLT1	0.025146	0.0016718	0.49394		DPP8	0.040293	0.0033891	-0.31434
CA1	0.025156	0.0016735	1.6817		TRIM32	0.040326	0.0033954	-0.53691
CDC45	0.025265	0.0016839	0.97221		FBP1	0.040326	0.0033968	-1.1806
MTCL1	0.025313	0.0016891	0.87833		EEF2K	0.040528	0.0034184	-0.62311
DNAJB11	0.025329	0.0016923	0.71834		HAPLN2	0.040528	0.0034188	-1.3245
SYNGR2	0.025329	0.0016917	0.57588		NDRG1	0.040773	0.003451	-0.72762
STEAP4	0.025362	0.0016955	1.1184		DGKB	0.040773	0.0034506	-1.6662
MIXL1	0.025577	0.001718	1.3877		SLC6A20	0.040773	0.0034497	-1.0756
RP4-737E23.6	0.025577	0.0017183	1.7051		PRR15	0.040773	0.0034479	-1.0113
SETD7	0.025604	0.0017212	0.77857		RP11-887P2.5	0.040773	0.0034512	-1.6842
SLC39A7	0.02565	0.0017274	0.60368		PHKA2	0.040977	0.0034752	-0.50951
KIF18A	0.025791	0.0017391	1.005		TMEM106B	0.04099	0.0034817	-0.45503
MPZL2	0.025863	0.001745	0.86544		COQ6	0.04099	0.0034846	-0.71753
CCNB1	0.025886	0.0017486	1.0878		ATP1A1	0.04099	0.0034827	-1.0396
PDIA6	0.025886	0.0017481	0.62973		Y_RNA	0.04099	0.0034848	-1.6792
IDH2	0.026024	0.001759	0.5748		ACTR1B	0.041221	0.0035094	-0.34969
ERRFI1	0.026032	0.0017617	1.421		MGAT3	0.041221	0.0035088	-0.80743
SPCS3	0.026032	0.0017614	0.58249		LINC01088	0.041316	0.0035193	-1.4231
LYAR	0.026052	0.0017653	0.76016		RP11-797A18.5	0.041326	0.0035218	-1.3222
IFI27	0.026742	0.0018186	0.85069		RPSAP75	0.041447	0.0035338	-1.6897
SRPRA	0.026805	0.001825	0.49905		TUSC1	0.041582	0.0035487	-0.58695
MAP3K5	0.026851	0.0018315	0.41973		GS1-115G20.2	0.041582	0.0035476	-1.7332
CD276	0.026858	0.0018331	0.69558		IQSEC2	0.041623	0.0035539	-0.60084
MAD2L2	0.026942	0.0018421	0.76049		ENTPD2	0.041645	0.0035575	-0.96686
DDX21	0.027075	0.0018534	0.71267		MROH7	0.041648	0.0035595	-1.4145
MECOM	0.027345	0.0018769	0.73242		LINC00488	0.041731	0.0035686	-1.6229
GZMB	0.027345	0.0018779	1.205		RP4-604K5.3	0.041731	0.00357	-1.7296
TCF19	0.027345	0.0018798	0.74456		RP11-77K12.10	0.041839	0.003581	-1.2889
EPHB1	0.027345	0.001879	1.2865		RP11-326K13.4	0.041862	0.0035846	-1.0725
UBE2T	0.027424	0.0018897	1.0218		UGT1A6	0.041953	0.0035942	-1.4233
IGLV2-18	0.027469	0.0018962	1.3673		FRG1BP	0.042172	0.0036204	-0.84952
RELA	0.027506	0.0018999	0.38032		GREM2	0.042268	0.0036359	-1.5992
RACGAP1	0.027546	0.0019038	0.68716		LINC01336	0.042268	0.0036369	-1.3161
INHBA	0.02772	0.0019204	1.6538		AQP1	0.042306	0.0036418	-0.8663
FIBIN	0.027787	0.0019262	1.4661		SPPL2A	0.042345	0.0036469	-0.63476
RP3-508I15.21	0.027999	0.0019497	1.1885		RP13-452N2.1	0.042503	0.0036693	-1.2698
KNSTRN	0.028005	0.0019516	0.78452		TADA2B	0.042705	0.0036983	-0.44652
CATSPERB	0.028035	0.001956	1.036		KLHDC1	0.042707	0.0037009	-0.89537
CASP1	0.028035	0.0019552	0.8093		SLC5A4	0.042881	0.003721	-1.412
SH3KBP1	0.028252	0.0019763	0.46419		HOXA6	0.04293	0.0037308	-1.3392
ADK	0.028252	0.0019739	0.67131		BMP3	0.042985	0.0037391	-1.167
FMO2	0.028357	0.001992	1.3788		RASL10B	0.042985	0.0037382	-1.4235
CDK2AP1	0.028357	0.0019948	0.71369		RPS6KA6	0.043008	0.0037463	-0.88797
KY	0.028357	0.0019946	1.6269		HADHB	0.043008	0.0037436	-0.77055
RP11-73M7.6	0.028363	0.0019964	1.3852		CPO	0.043189	0.003764	-1.562
PLA2G10	0.028644	0.0020185	0.88052		ARSD	0.043227	0.003769	-0.65466
PHGDH	0.028753	0.0020286	1.1376		RP11-350E12.4	0.043429	0.0038009	-1.4889
ALDH1L1	0.028754	0.0020298	1.5229		AUTS2	0.043457	0.0038088	-0.7284
NFKBIA	0.028834	0.0020402	1.1007		ASTN2-AS1	0.043457	0.0038073	-1.7136
NMNAT2	0.028917	0.0020495	1.3602		MTMR7	0.043468	0.0038115	-0.92614
FAM49A	0.028917	0.0020532	0.94291		ABCC13	0.04348	0.0038144	-0.97501
SGOL2	0.029013	0.0020636	0.76453		LRRC19	0.043488	0.0038178	-1.0991
SLCO2A1	0.029128	0.002073	0.93823		SLC17A8	0.043505	0.0038219	-1.5087
SLC9B2	0.029146	0.002076	1.0753		ESRRA	0.043563	0.0038294	-0.76103
LIPM	0.029146	0.0020766	1.4466		ANKRD52	0.043723	0.0038465	-0.40349
ZNF385D	0.029187	0.0020808	1.2928		FOXP1-IT1	0.043749	0.0038505	-1.6041
KMT5A	0.029292	0.0020918	0.34058		OXNAD1	0.043829	0.0038593	-0.52835
OR52K3P	0.029292	0.0020906	1.7189		RP11-867G23.8	0.044047	0.0038804	-0.68618
ZNF385A	0.029538	0.0021119	0.82933		TERT	0.044131	0.0038917	-0.94209
DLGAP5	0.029575	0.0021157	0.98912		KCTD3	0.044189	0.003902	-0.74812
BLVRA	0.029746	0.0021353	0.72943		RP11-542B15.1	0.044214	0.0039096	-1.5815
AARS	0.029779	0.0021388	0.47393		DPP10-AS1	0.044214	0.0039077	-1.5392
NOLC1	0.029788	0.0021408	0.59083		MEP1B	0.044283	0.0039187	-1.492
RP11-54O7.1	0.02988	0.0021486	1.8245		VPS41	0.044579	0.0039493	-0.37413
BST2	0.029936	0.0021599	0.87442		FOXP2	0.044937	0.0039859	-0.9166
ACMSD	0.029936	0.0021604	1.6155		KRT39	0.045017	0.0039973	-1.6121
BX470102.3	0.029936	0.0021605	1.1701		MAF	0.045105	0.0040069	-1.0308
DYRK4	0.029944	0.0021631	0.51109		CRYZ	0.045117	0.0040098	-0.64806
SLC45A3	0.029957	0.0021662	0.82271		AC011298.2	0.045144	0.0040142	-1.2897
TRIM27	0.029975	0.0021702	0.40948		GPALPP1	0.045198	0.0040226	-0.37091
DRAM1	0.030046	0.0021766	0.9187		KLHL23	0.045198	0.0040221	-0.62131
RNF39	0.030274	0.0021993	1.0509		G6PC	0.045431	0.0040516	-1.6106
ITGB2	0.030549	0.0022243	1.0347		CIR1P2	0.045517	0.0040641	-1.6264
UBXN11	0.030814	0.0022525	0.86817		CREBL2	0.045538	0.0040686	-0.45161
KIF14	0.030967	0.0022687	0.9473		CHMP4C	0.045596	0.0040786	-0.81333
RFX8	0.030967	0.0022677	1.7037		PLAG1	0.045695	0.0040913	-0.86102
MAP4K4	0.031085	0.0022812	0.71896		RP11-809C18.3	0.045695	0.0040898	-1.7027
ACBD3	0.031087	0.0022827	0.51324		KBTBD11	0.045945	0.0041193	-0.78995
SIL1	0.031173	0.0022903	0.63291		RAB11FIP3	0.045985	0.0041248	-0.45072
BCL6	0.031243	0.0022966	1.0238		KLHL36	0.045998	0.0041279	-0.46408
THBS2	0.031277	0.0023019	1.2167		ACOX1	0.046157	0.0041459	-0.90942
RP11-768B22.2	0.031277	0.002304	1.6269		TMEM229A	0.04651	0.0041853	-1.3139
ERO1B	0.031496	0.0023218	0.77126		RPSAP9	0.04651	0.0041848	-1.0064
FAM83D	0.032072	0.0023721	0.96322		HNF1A	0.046606	0.0041958	-0.87488
GOLM1	0.032129	0.0023789	0.97979		PLIN1	0.04672	0.0042088	-0.95049
HSH2D	0.032205	0.0023898	0.86243		CADM3	0.046859	0.0042263	-1.1898
RP11-7K24.3	0.032228	0.0023944	1.1798		ZNF3	0.046864	0.0042306	-0.386
KLK11	0.032458	0.0024166	1.4917		ZFYVE19	0.046906	0.0042363	-0.42447
MIR3142HG	0.032532	0.0024249	1.4229		FBXO3	0.047047	0.0042623	-0.39642
PRAF2	0.032925	0.0024636	1.1263		ADAMDEC1	0.047224	0.0042806	-1.1882
TRAFD1	0.03296	0.0024676	0.55701		METTL7B	0.047329	0.0042921	-1.0722
AL591518.1	0.032968	0.0024695	1.6588		LRP4	0.047341	0.0043005	-0.86505
LINC00467	0.033131	0.0024894	0.60113		SLC39A4	0.047341	0.0043006	-1.053
MZT1	0.033131	0.0024899	0.64781		ZDHHC11	0.047341	0.0043025	-0.9764
IQGAP3	0.033313	0.0025066	0.95057		RP1-35C21.1	0.047341	0.0043115	-1.5132
SLC25A19	0.03334	0.0025133	0.7513		LINC00842	0.047341	0.0043101	-1.4445
LINC00672	0.03334	0.0025138	0.78008		PIGCP1	0.047748	0.0043594	-1.0725
OAS2	0.033358	0.0025179	0.92256		PTEN	0.047826	0.0043685	-0.36721
UBE2C	0.033693	0.002564	1.0286		RP11-77K12.3	0.047856	0.0043752	-1.6485
HELZ2	0.033714	0.0025669	0.60177		GPBP1L1	0.048056	0.0043994	-0.45491
CD80	0.033741	0.0025714	1.408		RB1CC1	0.048168	0.0044136	-0.54068
B3GNT2	0.033741	0.0025719	0.66806		KIAA1109	0.048196	0.0044193	-0.5617
AC008984.7	0.033741	0.0025731	1.7685		SLC22A23	0.048547	0.0044618	-0.81712
MRAP2	0.033773	0.002577	1.0465		CCL5	0.048547	0.0044605	-0.98975
SPDL1	0.033814	0.0025838	0.6673		KIF3B	0.048597	0.0044689	-0.84599
STIP1	0.033814	0.0025843	0.63418		ZNF493	0.048647	0.0044795	-0.67961
CCL11	0.033824	0.0025864	1.2643		RP11-44F14.7	0.048647	0.0044793	-1.6831
AC058791.1	0.03387	0.0025927	1.2739		ZDHHC9	0.048734	0.0044896	-0.80045
UBAP2	0.033982	0.0026027	0.44372		VAT1	0.048748	0.0044932	-0.57955
KLK7	0.034016	0.0026067	1.785		APOBEC2	0.048759	0.0045024	-1.3273
IGHV3-20	0.034061	0.0026141	1.7505		TRAPPC8	0.048759	0.004505	-0.43105
RAB3C	0.034223	0.0026296	1.2096		TTC30A	0.048759	0.0045059	-0.64356
POU2AF1	0.03428	0.0026354	1.2318		RP5-881L22.5	0.048759	0.0045002	-1.1896
GLT8D1	0.03433	0.0026437	0.34055		HADH	0.048894	0.0045203	-0.81419
RCN1	0.03433	0.0026439	0.71382		TGOLN2	0.048897	0.0045226	-0.73899
NOP14	0.03433	0.0026465	0.55269		FBXW2	0.048915	0.0045283	-0.34152
IL10	0.03433	0.0026495	1.2704		TP53TG5	0.048925	0.0045313	-0.91224
PDIA3	0.03433	0.002649	0.61221		LHFPL3	0.049126	0.0045599	-1.1227
RP11-665C16.6	0.03433	0.0026506	1.7732		CYP2S1	0.049247	0.0045773	-1.087
TNFRSF18	0.034368	0.0026549	1.0074		DOCK9-AS1	0.049247	0.0045752	-1.6548
DUSP4	0.03444	0.0026618	1.1963		SLC10A5	0.049254	0.0045799	-1.1114
CCR4	0.034445	0.0026637	1.2444		NT5DC1	0.049259	0.0045844	-0.46429
CHAC2	0.034496	0.00267	0.89342		SI	0.049298	0.0045921	-1.1848
RHOG	0.034705	0.0026881	0.51022		RP11-800A3.4	0.0493	0.0045943	-0.90098
CALR	0.034815	0.0027023	0.62367		OMD	0.049324	0.0046067	-1.6196
NOX4	0.03494	0.0027134	1.4052		A1CF	0.049324	0.0046039	-0.9474
LLNLR-268E12.1	0.03501	0.0027203	1.6843		LSM11	0.049324	0.0046016	-0.48676
POLB	0.035013	0.0027243	0.57121		GAPDHP32	0.049324	0.0046039	-1.6379
GRIP2	0.035013	0.0027242	1.0474		MIEF1	0.049334	0.0046117	-0.38869
CDK2AP2	0.035013	0.0027249	0.64124		POFUT1	0.049475	0.004631	-0.66632
AC121251.1	0.035046	0.0027289	1.7703		ACOT2	0.049475	0.004633	-0.69472
MSLN	0.035129	0.0027407	1.4229		STAU2-AS1	0.049475	0.0046302	-1.3854
EML2	0.035129	0.0027411	0.53087		C1orf21	0.049546	0.0046478	-0.68433
ACTB	0.035312	0.0027612	0.57363		PPM1A	0.049574	0.0046557	-0.65745
BCL10	0.035362	0.0027665	0.89215		WDTC1	0.049574	0.0046557	-0.4342
ADAMTSL4	0.035411	0.0027718	0.8947		ACOT4	0.049574	0.0046565	-0.91008
SLC25A33	0.035502	0.0027833	0.66615		NCK2	0.049616	0.0046647	-0.54682
ARSJ	0.035685	0.0028079	1.3921		KCTD9P4	0.049621	0.0046691	-1.6659
EPN3	0.035879	0.0028261	1.0302		RAB11FIP4	0.049637	0.0046726	-0.55013
ZMYND19	0.035964	0.0028343	0.62915		LMTK2	0.049663	0.0046791	-0.67958
WBSCR28	0.036018	0.00284	1.7745		POMT1	0.049695	0.0046863	-0.53265
PTGS2	0.036058	0.0028454	1.5294		SLC15A1	0.049845	0.0047045	-1.254
TNFRSF11B	0.03611	0.002856	1.2399
C16orf59	0.036433	0.0028833	1.1042
APOL1	0.03646	0.0028925	0.86191
CMAHP	0.03646	0.0028929	0.8571
PCAT6	0.03646	0.0028922	1.1604
MRPL17	0.036524	0.0028995	0.76588
YOD1	0.036539	0.0029021	1.0587
PSMD14	0.036726	0.0029216	0.71591
ANGPT2	0.036885	0.0029372	1.2133
AF064858.8	0.036894	0.0029394	1.4397
HMMR	0.036918	0.0029438	0.94441
RP11-250B2.6	0.036941	0.0029493	1.1281
REG4	0.036975	0.002955	1.1376
IFI27L2	0.037069	0.002972	0.85484
GNG5	0.037069	0.0029732	1.0294
CDH6	0.037206	0.0029933	0.97625
SEC61B	0.037263	0.0029994	0.74565
GPATCH4	0.037313	0.003005	0.59513
PTP4A3	0.037488	0.0030276	1.0631
ITPRIP	0.037598	0.0030395	0.97392
EXO1	0.037598	0.0030403	0.99383
SPINK5	0.037682	0.0030534	1.3504
MTX1	0.037738	0.0030594	0.71108
FAS	0.037778	0.0030657	0.44274
CD300C	0.037778	0.0030642	1.182
PPRC1	0.037805	0.0030695	0.71743
CDC6	0.037937	0.0030844	0.93219
EDNRA	0.037992	0.0030909	1.1103
EIF5A	0.038088	0.0031066	0.74159
IGHGP	0.038166	0.0031145	1.7263
KIF26B	0.038476	0.0031446	1.0771
RP11-347C18.3	0.038494	0.0031486	1.4758
MESDC1	0.038646	0.0031663	0.47897
CTB-51J22.1	0.038646	0.0031643	1.6316
B3GNT6	0.03868	0.003174	1.503
IGHV1-69	0.038687	0.0031777	1.718
CDC37	0.038822	0.0031919	0.55291
TMEM132A	0.038929	0.003204	0.98885
KCNN4	0.03905	0.0032196	1.0708
DDIAS	0.03905	0.0032219	0.93707
ITGA5	0.039072	0.0032282	0.9144
PHLDA2	0.039093	0.003234	1.2616
COL5A3	0.039244	0.0032694	0.97783
RRBP1	0.039244	0.0032622	0.57159
C1QTNF6	0.039244	0.0032599	0.88887
ZFPM1	0.039244	0.0032618	0.56528
TREML3P	0.039244	0.0032702	1.7481
TUBB	0.039244	0.0032676	0.76362
CTD-2267D19.3	0.039266	0.0032737	0.68221
GMPR	0.03928	0.0032764	0.83573
SND1	0.039337	0.0032828	0.4706
GBAP1	0.039761	0.0033247	0.99548
PSMB2	0.040048	0.0033565	0.68742
ARHGEF39	0.040048	0.0033602	0.83306
SH3PXD2A-AS1	0.040048	0.0033578	1.7089
RP11-586D19.1	0.040204	0.003375	1.669
BDNF	0.040221	0.0033813	1.2372
RP11-863P13.3	0.040221	0.0033797	1.6431
ARF4	0.040326	0.0033967	0.69201
RANGAP1	0.040503	0.0034134	0.45548
TMEM70	0.040618	0.0034281	0.59328
DYRK3	0.040732	0.0034394	1.121
SLC45A4	0.040893	0.003463	0.73888
GPR19	0.04092	0.003467	1.2053
LIPG	0.040977	0.0034749	0.84521
DCUN1D5	0.04099	0.0034826	0.62813
LINC01235	0.041221	0.0035074	1.5074
TLR8	0.042091	0.0036078	1.2142
TRIP13	0.042157	0.0036151	0.67802
FARSB	0.042172	0.0036188	0.72617
LGALS9B	0.042172	0.0036216	1.0683
FGFBP1	0.042238	0.003629	1.6266
PHF23	0.042268	0.0036338	0.37344
E2F3	0.04242	0.0036551	0.58796
ICA1	0.042428	0.0036576	0.71609
GJA5	0.042475	0.0036634	1.0982
NOTUM	0.042488	0.0036662	1.5458
CACNA1C	0.042526	0.003673	0.95604
KPNA2	0.042529	0.003675	0.93451
EIF2B3	0.042617	0.0036844	0.69521
NDE1	0.042705	0.003699	0.58218
CDKN3	0.042705	0.0036987	1.0579
EZH2	0.042705	0.0036987	0.6699
COL18A1	0.042881	0.0037178	1.0448
SLC5A8	0.042881	0.0037213	1.4847
GTSE1	0.042888	0.0037237	0.89397
ADM5	0.04293	0.0037297	1.1559
COL11A2	0.043008	0.0037465	1.2037
REXO2	0.043236	0.0037734	0.59172
SH3RF3	0.043236	0.0037723	0.99315
RP11-37B2.1	0.043298	0.0037806	0.86563
FAM189A2	0.043304	0.0037829	0.94522
PCSK9	0.043361	0.0037897	1.1599
ZNF467	0.043414	0.0037961	0.80582
SPTSSB	0.043429	0.0038004	1.6015
MYCN	0.043451	0.0038046	1.007
EXOSC4	0.043488	0.0038186	0.73259
IGSF6	0.043563	0.0038306	0.84834
MAD1L1	0.044048	0.0038823	0.56421
TECPR1	0.044131	0.0038932	0.52067
PPIL1	0.044165	0.003898	0.73327
IGHJ6	0.044214	0.0039088	1.4158
UTP11L	0.044283	0.0039194	0.52989
DNAH5	0.044339	0.0039261	1.2467
METTL1	0.044913	0.0039806	0.89499
SMCO2	0.044937	0.0039865	1.5503
CENPN	0.044991	0.0039931	0.80879
ARID5A	0.045314	0.0040348	0.89156
RPP40	0.045324	0.0040376	0.9341
C1QTNF1	0.045431	0.0040521	0.73139
HLA-B	0.045431	0.0040527	0.58869
TANK	0.045478	0.0040587	0.47448
CTB-75G16.3	0.045538	0.0040697	1.6392
TDO2	0.045586	0.0040759	1.263
SPATA12	0.045737	0.0040969	1.5368
ZWILCH	0.04583	0.0041071	0.71477
GTPBP4	0.046105	0.0041394	0.51082
PLEKHM2	0.046222	0.0041537	0.3191
ZC3H18	0.046483	0.004179	0.24664
LINC01002	0.04672	0.0042099	1.019
TNFSF13	0.046787	0.0042179	0.76081
LYPD1	0.046863	0.0042286	1.6685
KATNBL1	0.046927	0.0042401	0.42385
ALOX15B	0.046935	0.0042435	1.4373
HLA-E	0.046935	0.0042447	0.50182
ERCC2	0.046952	0.0042482	0.5263
SERPINE2	0.047047	0.0042613	0.85347
ATAD3C	0.047047	0.0042626	1.2432
GGH	0.047341	0.0043126	0.83731
GYG1	0.047341	0.0043098	0.46285
E2F6	0.047341	0.0043102	0.51874
ADORA2B	0.047341	0.0043001	1.2063
SHMT2	0.047341	0.0043072	0.65854
CENPE	0.047502	0.0043292	0.78363
MAPRE1	0.047708	0.0043499	0.43465
BBC3	0.047739	0.0043561	0.92037
EHD1	0.047739	0.0043567	0.49654
TXLNA	0.047856	0.0043733	0.3918
CCND1	0.04795	0.0043857	0.60539
PLCD3	0.048047	0.0043966	1.1008
GSTP1	0.048061	0.0044019	0.74498
KDELC2	0.048196	0.0044202	0.52986
TIFA	0.048547	0.0044553	0.88161
ALDH4A1	0.048547	0.0044624	0.88894
SCAMP4	0.048547	0.0044624	0.35309
CCDC149	0.048641	0.0044749	0.51134
SFN	0.048748	0.0044948	1.2046
STIL	0.048759	0.0045004	0.79786
TSPAN18	0.04891	0.0045258	0.99283
PIGA	0.048974	0.0045378	0.75453
CLEC1A	0.049013	0.0045434	0.9033
TMEM52B	0.049052	0.004549	1.3874
IRAK3	0.049071	0.0045528	0.83823
CRACR2B	0.049237	0.0045723	0.56889
AC074289.1	0.049258	0.0045823	1.208
PLIN5	0.049298	0.0045912	1.3381
FARSA	0.049324	0.0046061	0.60249
PKM	0.049334	0.0046111	0.65892
C1orf122	0.049437	0.0046234	0.61011
PIK3R3	0.049481	0.0046356	0.76712
ERGIC2	0.049527	0.004642	0.30615
COTL1	0.049546	0.0046464	0.66068
ANXA2P2	0.049577	0.0046588	1.0627
ASGR2	0.049616	0.0046666	1.3198
SPINK1	0.049663	0.004678	1.0021
UTS2R	0.049694	0.0046842	1.4148
DUOXA1	0.049699	0.0046887	1.4666

## Sheet: Supplemental Table S2
Supplemental Table S2. The 253 of the 1232 upregulated genes in CD patients restored to non-IBD gene expression level by Mito-Tempo.
Gene	padj value	log2FoldChange CD veh vs non-IBD veh	log2FoldChange CD MT vs CD veh
FIRRE	0.00096449	2.3407	-0.34823
IGKV5-2	0.0015763	1.9266	-0.5582
IGLV3-19	0.0020141	1.7221	-0.46704
IGHV4-55	0.0030216	2.1798	-0.15554
CLDN1	0.0030707	1.9795	-0.35475
IGLV7-46	0.0031796	1.5461	-0.40729
IGKV2D-24	0.0034971	1.8953	-0.31475
IGKJ4	0.0036053	1.8038	-0.2401
MLH1	0.0036803	0.52106	-0.19289
BUB1	0.0038727	0.52106	-0.61214
AUNIP	0.0038729	1.4432	-0.44562
RAB43	0.0039049	0.99268	-0.27283
IGHV1-58	0.0040307	1.9258	0.016967
MSI2	0.0044165	0.68181	-0.22869
NOL6	0.0044646	0.75785	-0.28136
IL23A	0.0045117	1.347	0.67004
IGLL5	0.005182	1.4959	-0.45343
SPCS2	0.005284	0.68157	-0.25411
CAPN6	0.0054976	1.8396	-0.17962
EAF2	0.0057139	1.2562	-0.55496
IGLV9-49	0.0058233	1.7556	-0.48448
IGHV4-61	0.0058644	1.7812	-0.22031
IARS	0.0059543	0.72208	-0.28047
WFDC2	0.0061961	1.3698	-0.49333
QPCTL	0.006296	0.73437	-0.2313
CCL17	0.0063105	1.8234	-0.16315
SHCBP1	0.0063659	1.1759	-0.50072
CPNE5	0.0063712	1.4344	-0.27706
IGKV1-33	0.0067298	1.5537	-0.39391
IGLV7-43	0.0068517	1.5423	-0.32445
ZNF628	0.0073693	0.65894	-0.19146
SLC16A14	0.0076634	1.2333	-0.44363
RP11-439A17.9	0.0077977	2.0962	0.0048609
IGLV3-16	0.0079829	2.1264	-0.14163
AC073072.5	0.0080191	2.1143	-0.55223
STK40	0.0081445	0.6564	0.083816
LINC00162	0.008349	2.1178	-0.24654
PART1	0.0083967	2.1178	-0.45154
UBE2J1	0.008748	0.67185	-0.23838
TROAP	0.008873	1.0897	-0.36057
IFI30	0.0088911	1.4984	-0.26949
FCRL5	0.0088924	1.4902	-0.37577
TNFRSF17	0.0089603	1.3491	-0.33768
PSME4	0.0089945	0.54935	-0.15375
BIK	0.0092033	1.2756	-0.50127
TPX2	0.009575	1.0722	-0.41929
IL17F	0.0096582	2.0945	-0.090535
ADRM1	0.0097151	0.67367	-0.22744
RPL24P4	0.0098255	1.6774	-0.47692
RP5-998N21.4	0.010299	2.0788	-0.1925
MRPL12	0.010413	1.1073	-0.75692
C6orf58	0.010572	2.0736	-0.086501
AC007386.4	0.010644	1.5579	-0.27712
TEX41	0.010949	2.0439	-0.18167
KCNE3	0.011124	0.94857	-0.25081
SYVN1	0.011212	0.76089	-0.33186
GTSF1	0.01149	1.5379	-0.15899
RP11-435I10.3	0.011787	2.0282	-0.088894
JCHAIN	0.012992	1.2863	-0.45523
OGFOD1	0.013282	0.62435	-0.24256
RP11-320G24.1	0.013287	1.999	-0.48585
RP11-89C3.4	0.013399	1.992	-0.45454
EPHA2	0.013781	1.4246	-0.27486
RP11-46D6.1	0.013885	0.93318	-0.24151
GIMD1	0.014334	1.8408	-0.29233
SRP72	0.014465	0.4595	-0.27322
KIAA0040	0.014701	0.88419	-0.34744
BHLHE41	0.014879	0.95462	-0.15131
SLC9A4	0.014882	1.9964	-0.073367
CYP2AB1P	0.014942	1.9967	-0.075667
NMB	0.015513	0.95466	-0.11772
TTC16	0.015529	1.8494	-0.41773
RUVBL1	0.015529	0.7903	-0.40525
GAST	0.015825	1.9515	-0.08724
SRP68	0.016034	0.42605	-0.21524
ANKRD20A10P	0.016054	1.9816	-0.31492
AL160272.1	0.016054	1.7022	-0.079507
CCL22	0.01622	1.3348	0.10104
SKA1	0.016385	1.191	-0.34471
ENTPD3	0.016915	1.4842	-0.18625
PLK1	0.017077	1.1251	-0.5678
FAM46C	0.017134	0.94661	-0.22682
C20orf24	0.017151	0.81074	-0.32173
B9D1	0.017367	1.2085	-0.44692
ARHGAP11B	0.017421	0.8212	-0.2443
IRF4	0.018242	1.0527	-0.19316
UNC13D	0.018247	0.87645	-0.24601
KRT72	0.018344	1.5882	-0.31751
ZNF185	0.018609	0.93508	-0.23398
KIF18B	0.01872	0.99918	-0.39276
DZIP1L	0.018741	0.92221	-0.20213
CDV3	0.018836	0.56587	-0.19158
ODF2	0.018914	0.52672	-0.15526
ODC1	0.019201	1.0449	-0.40798
DIAPH3	0.019201	1.167	-0.3959
CBX2	0.019423	1.1796	-0.49249
IGKV2D-40	0.019562	1.7374	-0.16889
PGLYRP1	0.019614	1.388	-0.15545
TXNDC15	0.019796	0.6178	-0.14377
RP11-219G17.4	0.019796	1.6206	-0.1486
RPL39L	0.019935	1.3039	-0.49541
HJURP	0.02	1.0999	-0.52567
ACOXL	0.020029	1.5392	-0.056461
IGKJ5	0.020078	1.5553	-0.24623
KIF2C	0.020216	1.0801	-0.20224
CDCA2	0.020512	1.0353	-0.38666
PMAIP1	0.02098	1.1918	0.092985
FBXW7	0.021046	0.66294	-0.12408
C18orf65	0.021046	1.914	0.090408
CYP2E1	0.021501	1.3391	-0.55832
CENPU	0.021501	0.88291	-0.27392
CKAP2L	0.02166	1.0016	-0.44675
IGKV3OR2-268	0.021868	1.6827	-0.049125
NINJ2	0.022057	0.98549	-0.26692
CCDC167	0.022245	0.98173	-0.36009
CCNF	0.022301	0.92837	-0.38241
FAM92B	0.022364	1.7355	0.021419
IGHG3	0.022843	1.6882	-0.52144
GM2A	0.022947	0.65843	-0.33715
FTSJ1	0.023811	0.71498	-0.29634
CCDC86	0.02383	0.64772	-0.32389
VSNL1	0.024057	1.7364	-0.029608
AURKA	0.024222	0.99101	-0.38749
CPZ	0.024312	1.8768	-0.26569
MELK	0.024419	0.93083	-0.30171
CDC45	0.025265	0.97221	-0.39771
SYNGR2	0.025329	0.57588	-0.20714
MIXL1	0.025577	1.3877	-0.24144
RP4-737E23.6	0.025577	1.7051	-0.1275
KIF18A	0.025791	1.005	-0.59628
CCNB1	0.025886	1.0878	-0.037281
SPCS3	0.026032	0.58249	-0.17298
SRPRA	0.026805	0.49905	-0.17673
DDX21	0.027075	0.71267	-0.19655
TCF19	0.027345	0.74456	-0.32548
EPHB1	0.027345	1.2865	-0.10836
IGLV2-18	0.027469	1.3673	-0.22151
RACGAP1	0.027546	0.68716	-0.32185
KNSTRN	0.028005	0.78452	-0.33687
SH3KBP1	0.028252	0.46419	-0.25383
ADK	0.028252	0.67131	-0.29324
KY	0.028357	1.6269	-0.086841
RP11-73M7.6	0.028363	1.3852	-0.054312
PHGDH	0.028753	1.1376	-0.33786
SGOL2	0.029013	0.76453	-0.34691
SLC9B2	0.029146	1.0753	-0.35209
LIPM	0.029146	1.4466	-0.24307
KMT5A	0.029292	0.34058	-0.093623
DLGAP5	0.029575	0.98912	-0.43186
NOLC1	0.029788	0.59083	-0.2236
RP11-54O7.1	0.02988	1.8245	-0.48007
BX470102.3	0.029936	1.1701	-0.074761
SLC45A3	0.029957	0.82271	-0.28488
TRIM27	0.029975	0.40948	-0.085024
KIF14	0.030967	0.9473	-0.22456
ACBD3	0.031087	0.51324	-0.13051
SIL1	0.031173	0.63291	-0.14355
RP11-768B22.2	0.031277	1.6269	-0.24097
FAM83D	0.032072	0.96322	-0.35825
GOLM1	0.032129	0.97979	-0.37853
HSH2D	0.032205	0.86243	-0.26488
AL591518.1	0.032968	1.6588	-0.28936
MZT1	0.033131	0.64781	-0.39284
IQGAP3	0.033313	0.95057	-0.25748
SLC25A19	0.03334	0.7513	-0.046025
LINC00672	0.03334	0.78008	0.082153
UBE2C	0.033693	1.0286	-0.45488
SPDL1	0.033814	0.6673	-0.37122
STIP1	0.033814	0.63418	-0.14225
UBAP2	0.033982	0.44372	-0.1997
IGHV3-20	0.034061	1.7505	-0.026841
POU2AF1	0.03428	1.2318	-0.42095
GLT8D1	0.03433	0.34055	-0.056776
NOP14	0.03433	0.55269	-0.409
RP11-665C16.6	0.03433	1.7732	-0.062525
CHAC2	0.034496	0.89342	-0.34726
LLNLR-268E12.1	0.03501	1.6843	-0.20772
CDK2AP2	0.035013	0.64124	-0.22223
AC121251.1	0.035046	1.7703	-0.15701
MSLN	0.035129	1.4229	0.062497
EPN3	0.035879	1.0302	-0.22707
WBSCR28	0.036018	1.7745	-0.30625
C16orf59	0.036433	1.1042	-0.44078
HMMR	0.036918	0.94441	-0.43233
RP11-250B2.6	0.036941	1.1281	-0.49478
GNG5	0.037069	1.0294	-0.16146
GPATCH4	0.037313	0.59513	-0.25551
EXO1	0.037598	0.99383	-0.24156
SPINK5	0.037682	1.3504	-0.33881
MTX1	0.037738	0.71108	-0.23908
FAS	0.037778	0.44274	-0.046126
CDC6	0.037937	0.93219	-0.33198
EIF5A	0.038088	0.74159	-0.29588
IGHGP	0.038166	1.7263	-0.36523
RP11-347C18.3	0.038494	1.4758	-0.40722
CTB-51J22.1	0.038646	1.6316	-0.16684
IGHV1-69	0.038687	1.718	-0.15123
KCNN4	0.03905	1.0708	-0.43845
DDIAS	0.03905	0.93707	-0.42559
TUBB	0.039244	0.76362	-0.36897
GMPR	0.03928	0.83573	-0.22882
SND1	0.039337	0.4706	-0.18652
GBAP1	0.039761	0.99548	-0.19705
ARHGEF39	0.040048	0.83306	-0.3701
RP11-586D19.1	0.040204	1.669	-0.086462
RANGAP1	0.040503	0.45548	-0.080929
TMEM70	0.040618	0.59328	-0.25151
GPR19	0.04092	1.2053	-0.60011
DCUN1D5	0.04099	0.62813	-0.22937
TRIP13	0.042157	0.67802	-0.067107
FARSB	0.042172	0.72617	-0.38545
FGFBP1	0.042238	1.6266	-0.21939
PHF23	0.042268	0.37344	-0.13827
E2F3	0.04242	0.58796	-0.11542
KPNA2	0.042529	0.93451	-0.40493
EIF2B3	0.042617	0.69521	-0.35607
NDE1	0.042705	0.58218	-0.25495
GTSE1	0.042888	0.89397	-0.27586
ADM5	0.04293	1.1559	-0.46802
PCSK9	0.043361	1.1599	-0.08405
SPTSSB	0.043429	1.6015	-0.064035
EXOSC4	0.043488	0.73259	-0.27998
MAD1L1	0.044048	0.56421	-0.17689
IGHJ6	0.044214	1.4158	-0.21451
DNAH5	0.044339	1.2467	-0.3399
METTL1	0.044913	0.89499	-0.341
SMCO2	0.044937	1.5503	-0.042793
CENPN	0.044991	0.80879	-0.55281
RPP40	0.045324	0.9341	-0.29309
SPATA12	0.045737	1.5368	-0.32005
GTPBP4	0.046105	0.51082	-0.28906
PLEKHM2	0.046222	0.3191	-0.074217
ZC3H18	0.046483	0.24664	-0.04097
ERCC2	0.046952	0.5263	-0.17624
ATAD3C	0.047047	1.2432	-0.24289
GGH	0.047341	0.83731	-0.32169
E2F6	0.047341	0.51874	-0.085453
ADORA2B	0.047341	1.2063	-0.49459
SHMT2	0.047341	0.65854	-0.39984
CENPE	0.047502	0.78363	-0.37849
MAPRE1	0.047708	0.43465	-0.012444
BBC3	0.047739	0.92037	-0.1298
PLCD3	0.048047	1.1008	-0.2001
GSTP1	0.048061	0.74498	-0.28824
ALDH4A1	0.048547	0.88894	-0.42981
STIL	0.048759	0.79786	-0.19805
FARSA	0.049324	0.60249	-0.3536
PKM	0.049334	0.65892	-0.2101
ERGIC2	0.049527	0.30615	-0.25495
COTL1	0.049546	0.66068	-0.15515
ANXA2P2	0.049577	1.0627	-0.2852
SPINK1	0.049663	1.0021	-0.18883
UTS2R	0.049694	1.4148	-0.073431

## Sheet: Supplemental Table S3
Supplemental Table S3. The 325 of the 1065 downregulated genes in CD patients restored to non-IBD gene expression level by Mito-Tempo.
Gene	padj value	log2FoldChange CD veh vs non-IBD veh	log2FoldChange CD MT vs CD veh
TMPRSS7	3.83e-06	-2.6431	0.50151
SLC5A11	5.1e-05	-2.0652	0.30243
MT2A	0.0002726	-1.35	0.46745
LRRN3	0.00031983	-1.9319	0.68308
GGT4P	0.00041852	-2.2617	0.0058007
CLCN1	0.00045103	-1.9061	0.54523
GATM	0.00045654	-1.4465	0.4937
RP11-146N18.1	0.00047075	-2.6388	0.017949
EIF1AXP1	0.00048577	-1.6007	0.44745
CRIP1	0.00074288	-1.2212	0.49068
MT1A	0.00087739	-1.718	0.55641
SLC6A18	0.0011629	-2.1179	0.41888
PNLIPRP2	0.0013504	-1.7696	0.41595
SAT2	0.0013981	-1.0727	0.24978
RP11-521B24.3	0.0016584	-1.5809	0.59726
RP11-116O18.1	0.0016584	-1.9902	0.34147
RP11-685B14.1	0.0019039	-2.2919	0.47652
OSR2	0.0019647	-1.2572	0.10524
CTC-510F12.7	0.0019986	-2.1038	0.27755
ZP2	0.0020093	-1.8846	0.25208
RP11-6B19.1	0.0023248	-2.3214	0.21832
FN3K	0.0023299	-0.80727	0.22014
DNAJB5-AS1	0.0024962	-1.9552	0.3357
C1orf168	0.0026206	-1.4947	0.40366
ADD3-AS1	0.0026237	-1.6279	0.66861
CYP46A1	0.0026358	-1.5285	0.48522
MUM1L1	0.0033009	-2.236	0.010417
TMEM63C	0.0033859	-1.1385	0.2281
RP11-43P8.2	0.003544	-1.7534	0.2658
AF127577.13	0.0038693	-2.1118	0.015444
NEDD4	0.0043141	-0.86997	0.27357
RP4-639F20.1	0.0043462	-0.8541	0.12119
AC004951.6	0.0045315	-1.8422	0.56615
IL17RC	0.0046918	-0.77153	0.25655
HSD3B1	0.0047116	-1.9968	0.16242
BSN	0.0050776	-1.053	0.21267
TM4SF5	0.0051008	-1.3682	0.38013
MROH2A	0.0053519	-1.8014	0.15041
DBP	0.0054022	-0.9581	0.36135
NEURL3	0.005687	-1.3246	0.60367
PHF21B	0.0060708	-2.167	0.203
ACSS3	0.0061859	-1.181	0.36582
RP11-375H19.2	0.0065129	-2.0117	0.26504
PDE9A	0.0077116	-1.2163	0.35846
ASTE1	0.0077705	-0.75601	0.24838
DDC	0.0079829	-1.1423	0.23155
TADA1	0.0079829	-0.43401	0.056608
ZNF780A	0.0080712	-0.69325	0.22359
BCHE	0.0082468	-1.542	0.47678
MAPT	0.0083936	-1.3809	0.26064
CLDN8	0.0089048	-2.1126	-0.096168
DNM1	0.0089202	-1.1989	0.27527
AP000344.3	0.0091073	-2.0154	0.21633
MAS1L	0.0091944	-2.008	0.69908
HSD11B2	0.0092896	-1.041	0.28723
ARPIN	0.0093854	-0.67594	0.16192
CHRM5	0.0094502	-1.5229	0.36384
RP11-631M6.3	0.0096229	-1.9791	0.46872
GSTA2	0.0096946	-1.5108	0.27892
AC006927.5	0.0099547	-1.8021	0.60979
HOXD1	0.010012	-1.3124	0.086037
TCP10L2	0.010131	-1.497	0.066097
REEP6	0.010236	-1.3049	0.35029
NDN	0.010536	-0.73321	0.38134
RP11-449O16.2	0.010661	-2.0673	0.049463
CNGA3	0.010742	-1.6977	0.46432
GOLT1A	0.011206	-1.2045	0.19358
MS4A15	0.011288	-1.6682	0.32756
ACRBP	0.011489	-0.92	0.28089
CTD-2184D3.3	0.011787	-2.0508	0.15698
SLC16A9	0.011788	-1.5592	-0.038021
AL033527.4	0.012023	-2.0334	0.29875
SCTR	0.012265	-1.2656	0.33269
RNU1-70P	0.012615	-1.5201	0.2635
SLC13A2	0.012718	-1.4663	0.38606
ADCY10	0.012718	-1.5464	0.33981
CTA-293F17.1	0.012807	-1.2405	0.2841
GNA11	0.012828	-1.0097	0.30262
RP11-96C23.9	0.013009	-2.0228	0.74787
MIR135A1	0.013136	-1.4477	0.30916
PDXP	0.013174	-1.1548	0.25642
TRPV3	0.013215	-1.4011	0.28933
NR1I3	0.013285	-1.378	0.52302
PEX1	0.013333	-0.44237	0.056457
ECI2	0.013461	-0.71174	0.14976
RP11-119D9.1	0.013571	-1.3744	0.31164
FOSL1P1	0.013893	-2.003	0.37955
SSPO	0.01421	-0.94674	0.22959
CTD-2540B15.9	0.01444	-1.9174	0.24475
DNASE1	0.014729	-1.0913	0.24743
PTPRD-AS1	0.014798	-1.5744	0.2923
GIPC2	0.014841	-1.0452	0.2286
CTD-2515A14.1	0.014882	-1.6876	0.30673
HNRNPA1P33	0.014946	-1.8203	0.2616
TMEM92-AS1	0.015098	-1.3559	0.23604
RP11-491F9.3	0.015211	-1.73	0.47718
AP3S2	0.01525	-0.58539	0.11867
SIRT5	0.015373	-0.42456	0.068031
CTC-558O2.2	0.015477	-1.9695	0.38237
CTD-2083E4.6	0.015879	-1.9299	0.24396
RP11-245G13.2	0.016003	-1.7717	0.26731
RP4-799G3.2	0.016054	-1.9117	-0.033075
RP11-274H2.2	0.016501	-1.9028	0.37871
SLC25A1	0.016564	-0.80589	0.15576
RP11-400G3.3	0.016615	-1.9415	0.1912
APOC3	0.016748	-1.7227	0.24142
LGALS2	0.016801	-1.0067	0.094477
ACOT12	0.016801	-1.7291	0.3184
LINC01595	0.016959	-1.9395	0.2135
KDSR	0.017027	-0.44983	0.11736
RP11-1069G10.1	0.017137	-1.4049	0.18111
CTD-2132N18.2	0.017151	-1.1441	0.2994
TUBA3D	0.01721	-1.4367	0.36905
COX10-AS1	0.017313	-0.69112	0.22015
TMEM120A	0.01734	-0.93663	0.23117
CYP27A1	0.017619	-1.0305	0.27215
DLG1	0.018202	-0.49919	0.12701
UGT2B29P	0.018268	-1.9348	0.20571
LDLRAD4	0.018373	-0.68053	0.13957
GSTA1	0.018926	-1.3697	0.23104
RP11-379B8.1	0.019034	-1.6326	0.47938
RP11-807H22.5	0.019069	-1.8107	0.016271
CYB5A	0.01909	-1.0142	0.2397
ITLN2	0.019106	-1.3571	0.3958
ANO5	0.019227	-1.1316	0.16515
UROC1	0.019348	-1.9254	0.087765
CSMD3	0.019357	-1.8007	0.10314
RP11-33N16.2	0.019614	-1.913	0.18804
FRMD3	0.01973	-1.009	0.30195
CLDN15	0.019739	-0.88404	0.2257
DPY19L4	0.019739	-0.50282	0.10035
GBA3	0.019745	-1.2029	0.34716
CHST6	0.019836	-1.2592	0.32456
GGT1	0.019908	-1.0427	0.29265
SULT1A2	0.020516	-1.1084	0.39769
CHST13	0.020575	-1.3868	0.34813
SMURF2	0.020937	-0.62325	0.28938
STAP2	0.020976	-0.82265	0.19168
NLRP11	0.020976	-1.8239	0.26377
CPOX	0.021545	-0.5088	0.14385
RP11-229D13.3	0.021545	-1.356	0.38538
SLC28A1	0.021662	-1.4928	0.18805
ZNF334	0.021662	-1.0762	0.18265
AADAC	0.021868	-1.374	0.18478
RP3-388M5.9	0.021868	-1.9009	0.32232
RP11-727A23.5	0.021989	-0.96295	0.43739
RP11-415F23.3	0.02208	-1.0981	0.3242
RP11-242G20.1	0.022194	-1.8919	0.12234
KHK	0.022395	-1.2514	0.25584
CD160	0.022843	-1.3095	0.25362
HAAO	0.022849	-0.87195	0.16392
SLC44A5	0.023083	-1.6827	0.29146
SORBS3	0.023884	-0.65745	0.23481
RP11-177C12.1	0.023884	-1.0637	0.29623
GLTSCR1-AS1	0.023937	-1.8651	0.37046
FLVCR2	0.023983	-1.0701	0.23503
SLC9A3R1	0.024092	-0.97182	0.2599
SMIM24	0.024245	-1.2383	0.35118
PGAM1P11	0.024273	-1.8651	0.095228
TRGV7	0.024676	-1.4024	0.27137
SLC5A12	0.025402	-1.6307	0.12064
RP11-226L15.1	0.025498	-1.8642	0.012746
PAOX	0.02565	-0.69677	0.1731
TEF	0.02565	-0.96394	0.2489
KIAA1456	0.026052	-1.0305	0.24997
AIG1	0.026724	-0.72766	0.12819
IL32	0.026799	-0.80035	0.33985
LINC01123	0.026937	-1.1108	0.22069
SMLR1	0.026983	-1.286	0.33111
HEBP1	0.027148	-1.0594	0.26872
CYP3A7	0.027369	-1.7512	0.31522
F11-AS1	0.027369	-1.8242	0.17992
WDR48	0.027961	-0.37709	0.083178
FAM73B	0.027976	-0.60103	0.13781
ESPN	0.027999	-1.101	0.35244
FABP2	0.028252	-1.1191	0.25484
LINC00526	0.028252	-0.90726	0.028534
MYOC	0.028293	-1.8384	-0.0092666
XCL1	0.028858	-1.1362	0.14493
LINC00992	0.028917	-1.0977	0.094198
DHRS11	0.028917	-0.95668	0.21744
PIPSL	0.028983	-1.4354	0.40645
CCDC85C	0.029666	-0.67971	0.14465
LINC00330	0.029894	-1.7224	0.22163
PPP2R2C	0.029936	-1.319	0.29428
RMND1	0.029957	-0.61143	0.10644
KLRD1	0.030367	-1.0598	0.29721
TKFC	0.030637	-0.91934	0.26331
SEMA3B	0.030968	-0.86864	0.19159
NSRP1P1	0.030968	-1.8051	0.43639
GGTLC5P	0.031962	-1.8081	-0.0092666
RP11-515O17.2	0.032168	-1.7766	0.28576
RP11-364L4.1	0.032203	-1.7427	0.2268
CEACAM18	0.032228	-1.2189	0.35089
PTGR1	0.032724	-1.0361	0.24422
LINC01413	0.032755	-1.7492	0.19484
NBL1	0.033131	-0.73959	0.15786
PEX26	0.033313	-0.80515	0.17982
NLRP9	0.033315	-1.483	0.67296
DGKQ	0.033398	-0.49481	0.19483
FAM132A	0.033482	-0.9247	0.31575
ZDHHC11B	0.033482	-1.2508	-0.14299
SPATA31C1	0.033482	-1.5906	-0.012618
RP11-432I5.8	0.033482	-1.5976	0.14344
NAT8B	0.033565	-1.545	0.24718
SAXO2	0.033664	-1.4785	0.73302
EIF4E3	0.034176	-0.71846	0.17255
CNDP2	0.03433	-0.91904	0.24498
RP11-513M16.8	0.03433	-1.2328	0.20027
TMEM92	0.034496	-1.008	0.20214
RP11-944C7.1	0.034739	-1.5307	0.29554
PTPN9	0.035129	-0.59671	0.16726
FAAH	0.035137	-0.62057	0.13049
ACADS	0.035312	-0.8325	0.20015
RP11-627G23.1	0.035449	-1.157	0.11247
RAB40C	0.035536	-0.55355	0.13195
AK4P1	0.035554	-1.6357	0.4122
CTD-2396E7.11	0.035554	-0.92806	0.2357
KIDINS220	0.035635	-0.33896	0.10269
FCF1P7	0.035768	-1.7735	0.080395
NUDT16P1	0.036089	-0.76607	0.079589
BDH2	0.036094	-0.88696	0.16146
RITA1	0.03611	-0.79652	0.093516
ZNF768	0.036439	-0.53788	0.066721
TMEM236	0.036616	-1.0831	0.24467
IGFBPL1	0.036781	-1.6669	0.70261
BHLHB9	0.036918	-0.72465	0.098702
DEFB1	0.036941	-1.4136	0.59786
MYO1A	0.036975	-1.0945	0.23793
RP11-1275H24.3	0.03706	-1.6029	0.42259
AC127035.1	0.03706	-1.7367	0.22488
KCNJ16	0.037069	-1.2316	-0.042616
FMR1-IT1	0.037321	-1.6002	0.29613
RP11-274A11.3	0.037459	-1.7046	0.33881
NALCN	0.037462	-1.3611	0.19792
GDPD1	0.037488	-0.95444	0.22207
MGC32805	0.037659	-1.4	0.1259
HOXA5	0.038039	-0.9445	0.055414
MYH15	0.038039	-0.97599	0.31435
TGFBR3L	0.038039	-1.1569	0.2393
ACVR2A	0.038076	-0.78255	0.21398
HRASLS2	0.038494	-1.1265	0.38906
PEBP1	0.03868	-0.84082	0.24016
SEZ6L	0.038687	-1.3738	0.60413
NR6A1	0.038767	-0.84476	0.18929
CDK18	0.039067	-0.64546	0.16223
CRIPT	0.039093	-0.56528	0.23709
LRRC29	0.039153	-0.97708	0.20032
GFOD2	0.039153	-0.31505	0.063597
FABP6	0.039153	-1.5656	0.25699
CYP1B1-AS1	0.039153	-1.1783	0.38703
TMEM25	0.039244	-0.96638	0.11253
RP1-240K6.3	0.039244	-1.4796	0.32075
RNF151	0.039413	-1.7162	0.47324
RP11-132F7.2	0.039761	-1.1937	0.41072
MLXIPL	0.039876	-1.018	0.17738
HOXA3	0.040221	-0.76648	0.079753
DPP8	0.040293	-0.31434	0.044882
HAPLN2	0.040528	-1.3245	0.26592
NDRG1	0.040773	-0.72762	0.15042
DGKB	0.040773	-1.6662	0.16979
PRR15	0.040773	-1.0113	0.1788
ATP1A1	0.04099	-1.0396	0.22755
Y_RNA	0.04099	-1.6792	0.13547
LINC01088	0.041316	-1.4231	0.25254
RP11-797A18.5	0.041326	-1.3222	0.086956
TUSC1	0.041582	-0.58695	0.28483
GS1-115G20.2	0.041582	-1.7332	0.27205
RP4-604K5.3	0.041731	-1.7296	0.028467
RP11-77K12.10	0.041839	-1.2889	0.51151
RP11-326K13.4	0.041862	-1.0725	0.23705
UGT1A6	0.041953	-1.4233	0.19364
GREM2	0.042268	-1.5992	0.15843
AQP1	0.042306	-0.8663	0.15799
KLHDC1	0.042707	-0.89537	0.21477
SLC5A4	0.042881	-1.412	0.26719
BMP3	0.042985	-1.167	0.042733
RASL10B	0.042985	-1.4235	0.2895
HADHB	0.043008	-0.77055	0.13832
HADH	0.043008	-0.81419	0.11003
RP11-350E12.4	0.043429	-1.4889	0.37096
ASTN2-AS1	0.043457	-1.7136	0.0092443
MTMR7	0.043468	-0.92614	0.47562
ABCC13	0.04348	-0.97501	0.34665
RP11-867G23.8	0.044047	-0.68618	0.20456
KCTD3	0.044189	-0.74812	0.16301
RP11-542B15.1	0.044214	-1.5815	0.22737
AC011298.2	0.045144	-1.2897	0.17427
GPALPP1	0.045198	-0.37091	0.00069066
KLHL23	0.045198	-0.62131	0.20176
KBTBD11	0.045945	-0.78995	0.10431
ACOX1	0.046157	-0.90942	0.24915
RPSAP9	0.04651	-1.0064	0.22356
PLIN1	0.04672	-0.95049	0.093648
CADM3	0.046859	-1.1898	0.30822
ZNF3	0.046864	-0.386	0.12316
ZFYVE19	0.046906	-0.42447	0.1155
ADAMDEC1	0.047224	-1.1882	0.47248
METTL7B	0.047329	-1.0722	0.22247
LRP4	0.047341	-0.86505	0.21879
SLC39A4	0.047341	-1.053	0.14012
ZDHHC11	0.047341	-0.9764	0.24676
LINC00842	0.047341	-1.4445	0.073531
RP11-77K12.3	0.047856	-1.6485	0.43227
RB1CC1	0.048168	-0.54068	0.09625
CCL5	0.048547	-0.98975	0.14745
ZNF493	0.048647	-0.67961	0.26562
RP11-44F14.7	0.048647	-1.6831	0.21056
VAT1	0.048748	-0.57955	0.16745
APOBEC2	0.048759	-1.3273	0.19839
TTC30A	0.048759	-0.64356	0.17898
RP5-881L22.5	0.048759	-1.1896	0.52243
TP53TG5	0.048925	-0.91224	0.51433
LHFPL3	0.049126	-1.1227	0.095574
CYP2S1	0.049247	-1.087	0.21127
DOCK9-AS1	0.049247	-1.6548	0.12669
SI	0.049298	-1.1848	0.35156
OMD	0.049324	-1.6196	0.41549
GAPDHP32	0.049324	-1.6379	-0.10352
C1orf21	0.049546	-0.68433	0.1117
NCK2	0.049616	-0.54682	0.17783
KCTD9P4	0.049621	-1.6659	0.29164
RAB11FIP4	0.049637	-1.6659	0.09649
LMTK2	0.049663	-0.67958	0.16006
SLC15A1	0.049845	-1.254	0.1797

## Sheet: Supplemental Table S4
Supplemental Table S4. The 376 altered genes with significant p value.
	MT Type I vs MT Type II
Gene	p value	padj value	log fold change
ERAP2	0.000219049	0.057346	-2.0857
CIDEA	0.00120584	0.057346	2.57239
LCE2A	0.00154826	0.057346	2.46774
ZNF429	0.00208457	0.057346	1.01561
ABCC9	0.00227113	0.057346	-1.1685
SLC9B2	0.00241597	0.057346	-1.13608
GRK1	0.00288881	0.057346	1.92214
NEURL3	0.00295893	0.057346	1.43305
SYNDIG1	0.00296225	0.057346	1.61715
QPRT	0.00303296	0.057346	1.14037
CPLX1	0.00326774	0.057346	-1.00075
KRT14	0.00345499	0.057346	2.36931
TMEM255B	0.00354041	0.057346	-1.32018
VWF	0.00389103	0.057346	-1.72922
CNTN1	0.00396246	0.057346	2.25162
SIGLEC14	0.00405569	0.057346	-3.29277
MT1H	0.00416709	0.057346	2.33338
BEX5	0.00422107	0.057346	2.28237
RPL10L	0.00442966	0.057346	2.28739
FGF13	0.00445117	0.057346	1.31504
IL2	0.00471452	0.057346	2.06679
PERM1	0.00477451	0.057346	-1.62795
AGTR1	0.00484911	0.057346	1.39409
HIST1H3E	0.00551533	0.057346	0.893445
SIGLEC5	0.00587398	0.057346	-2.07712
CD59	0.00597344	0.057346	-0.818637
MT1F	0.00606967	0.057346	1.81773
ISX	0.0060755	0.057346	1.80534
ERP27	0.00627158	0.057346	-1.89765
BCL11A	0.00636088	0.057346	0.71801
HSPG2	0.0070775	0.057346	-1.25479
CNTFR	0.0070881	0.057346	2.61591
ACMSD	0.0072768	0.057346	-3.06673
NOTCH3	0.0072904	0.057346	-1.11986
HMGCLL1	0.00753053	0.057346	2.31514
BMPER	0.00827201	0.057346	1.24427
ENTPD8	0.00829057	0.057346	0.919667
NYAP2	0.00839995	0.057346	-2.09743
ZNF287	0.00873279	0.057346	-1.15456
VWA1	0.00875164	0.057346	-0.967044
DRD1	0.00878469	0.057346	1.73435
SCARA5	0.00887427	0.057346	2.19589
TTL	0.00903228	0.057346	-0.529723
ESR1	0.00929148	0.057346	-1.72972
CDH24	0.00933135	0.057346	-0.723641
LYPD1	0.009404	0.057346	-3.00994
MT1E	0.00949021	0.057346	1.64894
LSM11	0.00953388	0.057346	0.681909
ADAMTS12	0.00989082	0.057346	-1.02485
GALNT13	0.00989239	0.057346	2.67097
EOGT	0.00998955	0.057346	-0.775579
OGN	0.0101134	0.057346	2.42354
NHSL2	0.0108141	0.057346	-0.889066
MT1G	0.0108989	0.057346	1.73798
ZSCAN10	0.0109737	0.057346	-1.80329
IGF2	0.011064	0.057346	-2.2975
TMEM121	0.0111151	0.057346	1.14019
ADRB1	0.0111203	0.057346	1.57124
RGS8	0.0111559	0.057346	-2.03847
RAMP3	0.0114291	0.057346	-1.06512
MT1M	0.0115039	0.057346	1.94332
KLHL35	0.0115234	0.057346	-1.69723
ITGA2B	0.0115997	0.057346	-1.49812
ADCY4	0.0119802	0.057346	-0.914797
USHBP1	0.0121891	0.057346	-0.831297
HIST1H4C	0.0122434	0.057346	-2.41793
CNTN4	0.012314	0.057346	0.927114
KCNH1	0.0125176	0.057346	1.74411
WIPF3	0.0130556	0.057346	1.94485
OR52D1	0.0130956	0.057346	1.2955
PECAM1	0.0132599	0.057346	-0.949608
LRFN4	0.0134771	0.057346	-0.874595
GSTM3	0.0135693	0.057346	0.975608
ZNF212	0.0137081	0.057346	0.710654
GPR31	0.0137393	0.057346	1.99396
TINAGL1	0.0138421	0.057346	-0.623791
HLA-A	0.0139232	0.057346	0.857427
FAP	0.0139911	0.057346	-2.43073
NOTCH4	0.0141763	0.057346	-1.02483
CDH5	0.0142585	0.057346	-0.869993
GPT	0.0143897	0.057346	0.735004
LOXL2	0.0150558	0.057346	-1.14365
LEMD1	0.0151084	0.057346	-2.24762
CYP46A1	0.0152899	0.057346	-2.24536
SRMS	0.0155185	0.057346	-1.85349
APPL2	0.0155574	0.057346	0.765853
GZMB	0.0155769	0.057346	-1.59379
APOBEC2	0.0158851	0.057346	1.86097
ENPP6	0.0162126	0.057346	0.94957
CYP2U1	0.0162727	0.057346	0.975061
LINGO1	0.0163776	0.057346	-1.55254
GADD45G	0.0164882	0.057346	0.782019
PRSS23	0.0165955	0.057346	-0.919875
LAMA5	0.0166818	0.057346	-0.721477
THRA	0.0167297	0.057346	0.586141
SMOX	0.0167445	0.057346	-1.06077
BCO2	0.0167735	0.057346	1.29318
ARHGEF15	0.0169894	0.057346	-0.83174
PDLIM7	0.0171113	0.057346	-0.714166
LPL	0.0173133	0.057346	-1.48435
SELP	0.0173742	0.057346	-1.51701
SGSM1	0.0174634	0.057346	0.918544
LIPE	0.0177442	0.057346	0.963533
CENPQ	0.0177791	0.057346	0.608082
SPTBN5	0.0181897	0.057346	-1.4564
SPTBN2	0.0184621	0.057346	-0.953403
FHL5	0.0185843	0.057346	-2.00933
HTR1B	0.0185887	0.057346	-1.78751
FAM124A	0.0186744	0.057346	-1.04056
SESTD1	0.0189005	0.057346	0.484768
MRVI1	0.0189009	0.057346	-0.712588
PUDP	0.0189277	0.057346	0.656557
SLC35E4	0.0189842	0.057346	-0.978467
DHH	0.0191403	0.057346	-1.65234
SNPH	0.0192086	0.057346	-0.743909
RAPGEF4	0.019317	0.057346	-0.867684
HIST2H2AB	0.0194639	0.057346	1.87782
UNC13D	0.0198191	0.057346	-0.794049
CHST10	0.0200231	0.057346	-0.868113
ADGRF5	0.0201015	0.057346	-0.877603
SPATA20	0.0202074	0.057346	-0.627977
KRT23	0.0202401	0.057346	-2.05765
GOLIM4	0.0204503	0.057346	0.721978
ZNF423	0.0206692	0.057346	-0.814615
IGLV10-54	0.0207646	0.057346	-3.44822
RFX6	0.0209588	0.057346	1.61486
PRR34	0.0210403	0.057346	1.77072
DIO3	0.021562	0.057346	2.53717
SEMA3E	0.0216921	0.057346	1.95686
PROZ	0.0219677	0.057346	-1.80189
IGHV4-34	0.0219941	0.057346	-2.62254
KCNJ8	0.0221117	0.057346	-1.38472
GPRIN2	0.0221399	0.057346	1.02419
CDC25B	0.022202	0.057346	-0.587247
B9D2	0.0222046	0.057346	-0.717579
VIPR1	0.0222637	0.057346	1.06112
PYY	0.0224334	0.057346	2.43007
PLPP3	0.0226458	0.057346	0.618743
KCNH8	0.0227512	0.057346	-1.05948
EDNRA	0.0227532	0.057346	-0.91021
PLXND1	0.0228293	0.057346	-0.804036
UBTD1	0.0228346	0.057346	-0.74319
ABCG4	0.023002	0.057346	-1.85054
RNF217	0.0232185	0.057346	-0.62274
RAPGEF3	0.0234716	0.057346	-0.807583
CD69	0.0236169	0.057346	1.13135
CD24	0.0237778	0.057346	-1.36777
RHBDL2	0.0237799	0.057346	-1.69923
C2CD2	0.0238249	0.057346	-0.456596
DOK5	0.0238525	0.057346	-1.27281
HOXC9	0.0239701	0.057346	1.32235
COL4A1	0.0241607	0.057346	-1.10118
ACVR1B	0.0242576	0.057346	0.619694
LPAR1	0.0243413	0.057346	0.743381
SELENBP1	0.024367	0.057346	0.782668
TIE1	0.0248596	0.057346	-0.738953
GLUD2	0.0249424	0.057346	-1.69425
BBS12	0.0249717	0.057346	0.93624
USP30	0.0249757	0.057346	0.695871
GLIS1	0.0250011	0.057346	1.65518
ACBD5	0.0250986	0.057346	0.582504
MC2R	0.0251158	0.057346	1.50399
BEST4	0.0254544	0.057346	1.58397
DSCAM	0.0255264	0.057346	-1.69314
HECW2	0.0256026	0.057346	-0.975818
TIPIN	0.0258559	0.057346	0.898976
CSPG4	0.0259016	0.057346	-0.772392
ACKR3	0.026049	0.057346	0.74418
HTR1D	0.0260896	0.057346	1.03166
TNFSF9	0.0261515	0.057346	1.64586
CEND1	0.0262334	0.057346	-2.01461
FGD5	0.0262685	0.057346	-0.612621
MAPK11	0.0263106	0.057346	-1.14822
IL7	0.0263202	0.057346	0.49825
HIP1	0.0264761	0.057346	-0.632057
ACVR2A	0.0264875	0.057346	0.760312
GGT1	0.0265005	0.057346	0.900863
GUCA2A	0.0265294	0.057346	2.47565
CACNA1C	0.0266077	0.057346	-0.9643
NARF	0.026868	0.057346	-0.497373
SLC1A4	0.0269685	0.057346	-0.844753
EPHA7	0.0273823	0.057346	1.96381
CD93	0.0274214	0.057346	-0.842877
COL15A1	0.0274537	0.057346	-0.932599
CASP12	0.0275348	0.057346	-1.58702
ADPRM	0.0275482	0.057346	0.564925
DEFB124	0.0276673	0.057346	-2.27933
LURAP1	0.0278023	0.057346	-1.78443
GUCA2B	0.028053	0.057346	2.16326
LAMC2	0.028057	0.057346	-1.45141
FCN3	0.0282649	0.057346	-2.07507
ENG	0.0282706	0.057346	-0.747016
KCNIP4	0.0282793	0.057346	-0.769038
TPTE2	0.0283098	0.057346	-2.41983
CHI3L1	0.0283997	0.057346	-3.00854
PROX1	0.0285098	0.057346	0.59108
IGHG3	0.0286492	0.057346	-2.60231
IGHV1-69	0.0286793	0.057346	-3.23681
GNG10	0.02878	0.057346	1.66955
DUOX1	0.0287959	0.057346	-0.830825
SLC27A1	0.028849	0.057346	-0.506229
TNFRSF10A	0.0289195	0.057346	-0.716302
CCDC102B	0.0291278	0.057346	-0.849689
INSM1	0.0291821	0.057346	0.755815
PMM1	0.0293617	0.057346	0.713424
MMP7	0.0293822	0.057346	-3.0771
KLHL8	0.0296938	0.057346	0.478602
B4GALNT2	0.0298651	0.057346	1.48736
ANO1	0.0300961	0.057346	-1.05256
STRADB	0.030384	0.057346	0.981407
PDK1	0.0304028	0.057346	-0.794435
ADCY9	0.0305833	0.057346	0.619124
IGHV3-7	0.0307922	0.057346	-2.17735
ABHD14B	0.0307945	0.057346	0.589944
PTN	0.0308866	0.057346	1.29731
HAPLN1	0.030915	0.057346	1.50857
PLEKHN1	0.0309513	0.057346	-1.01528
RASGRF2	0.0310229	0.057346	-0.731631
PCK1	0.0310266	0.057346	2.02601
KCNN4	0.031032	0.057346	-1.08628
NRCAM	0.0311014	0.057346	-1.64551
KCNJ5	0.0314258	0.057346	1.93972
CAPN8	0.031458	0.057346	-1.21009
ARSJ	0.0314676	0.057346	-1.31914
EDAR	0.0315306	0.057346	1.90425
GPR152	0.0315766	0.057346	-1.82205
CHST13	0.0317502	0.057346	1.83223
P4HA3	0.0319706	0.057346	-1.28915
LGR4	0.0321159	0.057346	0.781717
ELANE	0.0321277	0.057346	1.91827
SLC7A11	0.0321691	0.057346	-1.42184
PMEPA1	0.0322375	0.057346	-0.762948
PANK3	0.0326396	0.057346	0.625719
CALCRL	0.0326935	0.057346	-0.797263
ATP6V1G2	0.0327305	0.057346	1.42965
PLAT	0.0327391	0.057346	0.610174
SLIT1	0.0327728	0.057346	-1.45865
MPPED1	0.0329138	0.057346	1.7285
CNTN6	0.0331499	0.057346	-1.33828
PLPP6	0.0333738	0.057346	0.750355
SRI	0.0334072	0.057346	0.523114
BEND5	0.0334357	0.057346	0.948329
TM7SF2	0.0338379	0.057346	0.486255
XRCC4	0.0338771	0.057346	-0.681319
TAS1R3	0.0338896	0.057346	-1.25952
SLC26A3	0.0339211	0.057346	1.26995
NPDC1	0.0342885	0.057346	-0.501312
PLPP4	0.0343348	0.057346	-1.78315
HOXA11	0.0343697	0.057346	2.23541
ASUN	0.034411	0.057346	-0.398239
ZNF391	0.0344354	0.057346	1.60159
ANO3	0.0344571	0.057346	1.62612
GRM2	0.0344867	0.057346	-2.41343
ZBTB7B	0.0345312	0.057346	0.551418
MPO	0.0348021	0.057346	1.46505
LTBP4	0.0348813	0.057346	0.631648
TNNC1	0.0350164	0.057346	1.85317
CSF3R	0.035138	0.057346	-1.84311
FGF9	0.0352449	0.057346	0.889519
CEACAM6	0.0353639	0.057346	-1.58116
UCP3	0.0353703	0.057346	-1.01961
PAQR5	0.0354021	0.057346	1.76607
TRIM46	0.0354037	0.057346	-1.20688
B3GALT5	0.0354379	0.057346	1.14675
KLK12	0.0356346	0.057346	1.90744
SYDE1	0.0356772	0.057346	-0.557404
TMEM252	0.0357017	0.057346	2.59518
FCGR3A	0.0359168	0.057346	-1.29262
NACAD	0.0360948	0.057346	1.05245
GJC1	0.03623	0.057346	-0.847099
CATSPER1	0.0362533	0.057346	-2.05324
IGKV1-16	0.0367179	0.057346	-1.75709
TPD52L1	0.0367696	0.057346	-0.556871
PFKFB4	0.0373414	0.057346	1.02641
LIPG	0.0373893	0.057346	-0.823457
MT-CO2	0.0376069	0.057346	-0.488637
IHH	0.0376163	0.057346	0.913532
PIK3R3	0.0376544	0.057346	-0.706857
PARVB	0.0379638	0.057346	-0.742539
ALDOC	0.0380261	0.057346	1.03131
HAS2	0.0380655	0.057346	1.01713
AKR1C2	0.0380711	0.057346	1.63188
TFAP2E	0.0381397	0.057346	-1.34074
RASL12	0.0382236	0.057346	-0.570483
HIST1H2BI	0.0386689	0.057346	1.91229
PODXL	0.0386795	0.057346	-0.644756
CD34	0.0387611	0.057346	-0.618681
MCAM	0.0392776	0.057346	-0.768392
S100A11	0.0393532	0.057346	-0.67734
CLCN1	0.0394184	0.057346	1.26499
GATM	0.0394522	0.057346	1.24153
SLC51B	0.0396295	0.057346	0.945588
FAM3A	0.0396681	0.057346	0.469293
TPM4	0.039769	0.057346	-0.595384
RGS17	0.0398254	0.057346	1.24758
ASB13	0.0399493	0.057346	0.744567
GJA5	0.0399626	0.057346	-0.9314
STYK1	0.040038	0.057346	0.787427
IGKV1-17	0.0402258	0.057346	-1.49435
CHRDL1	0.0402954	0.057346	1.25205
FAM105A	0.0403051	0.057346	0.541263
SERPINA7	0.0403365	0.057346	1.89749
SHC2	0.0404774	0.057346	-0.446767
RBP3	0.0406275	0.057346	1.82809
DOK4	0.0406694	0.057346	0.637842
GRIK5	0.0406727	0.057346	1.63347
MIR215	0.0407131	0.057346	1.78056
MT-TP	0.0408117	0.057346	-0.658708
TRPM6	0.0411845	0.057346	1.17049
SLC22A5	0.0411955	0.057346	0.982162
CORT	0.0411984	0.057346	-1.61558
PDGFB	0.041223	0.057346	-0.842802
SMPD3	0.0412241	0.057346	0.826137
IL32	0.0413329	0.057346	0.640337
SAP30L	0.0413851	0.057346	0.433737
ID2	0.0414665	0.057346	0.537481
CREB5	0.0417642	0.057346	-0.976819
HTRA1	0.0418172	0.057346	-0.554303
MRPS36	0.0419639	0.057346	0.448261
SIGMAR1	0.0419779	0.057346	0.621282
NTPCR	0.042153	0.057346	0.540727
ARID3A	0.0423893	0.057346	-0.690374
SHANK3	0.0423962	0.057346	-0.860549
THY1	0.0429155	0.057346	-1.00435
GP2	0.043057	0.057346	2.09457
MAP4K3	0.0431183	0.057346	0.449385
HPSE2	0.0431443	0.057346	1.2738
TRPV4	0.043426	0.057346	-1.17949
CDKN2C	0.0434318	0.057346	0.584706
CCDC8	0.0435679	0.057346	0.820526
ABCB10	0.0436525	0.057346	0.464869
MAPK8IP2	0.0436709	0.057346	1.66066
PXDN	0.043965	0.057346	-0.717227
NDUFA13	0.0440349	0.057346	0.818417
KCNN3	0.0441114	0.057346	-0.924645
MFAP4	0.0442743	0.057346	1.18363
TEAD4	0.0444874	0.057346	-0.734359
KDR	0.0445294	0.057346	-0.78391
IGKV1-5	0.0445333	0.057346	-1.62793
IRF4	0.0446113	0.057346	-0.817892
SLC24A3	0.0446301	0.057346	0.737179
MACROD1	0.0447862	0.057346	0.710894
BEX1	0.0447949	0.057346	1.62784
PDGFC	0.0448255	0.057346	0.953622
XCL1	0.0448257	0.057346	0.903734
HYAL2	0.0448278	0.057346	-0.657384
IGSF3	0.044881	0.057346	0.834757
IRF2BPL	0.0451376	0.057346	0.417872
IMPDH1	0.0451804	0.057346	-0.621844
DENND3	0.0452849	0.057346	-0.84346
RUNDC3B	0.0453341	0.057346	1.06491
MINOS1	0.0453656	0.057346	0.637277
PDZD3	0.0457335	0.057346	1.11788
HRASLS2	0.0458725	0.057346	1.26991
UBXN8	0.0460732	0.057346	-0.499872
COL4A2	0.0462956	0.057346	-0.767655
CBX2	0.0463363	0.057346	-1.01969
ZNF595	0.0464315	0.057346	0.54727
EFCAB8	0.0464366	0.057346	1.53505
NBPF1	0.0464551	0.057346	0.676982
XCR1	0.0465993	0.057346	1.29316
COL6A5	0.0466706	0.057346	1.55349
ACBD4	0.0467583	0.057346	0.73966
SEPHS2	0.0468026	0.057346	0.599793
CYBRD1	0.0471228	0.0574647	1.05174
AEBP2	0.0471571	0.0574647	0.421953
CDKN2B	0.0474893	0.0577118	0.920463
MDFI	0.0478128	0.0579471	-1.15818
GRHL1	0.0483975	0.0583395	-1.02469
STAP2	0.0484096	0.0583395	0.724344
PRUNE	0.048529	0.0583395	0.443404
KCTD21	0.0490618	0.0587526	-0.497275
CENPN	0.0491625	0.0587526	-0.52256
UBAP2	0.0492679	0.0587526	-0.371605
ZBTB47	0.0495293	0.0589069	-0.460696
ALDH1B1	0.0498064	0.0589196	1.08599

## Sheet: Supplemental Table S5
Supplemental Table S5. Genes present in Fig. 5A Clusters A and D.
Gene
MPO
GPR152
RGS8
CNTN6
CIDEA
HPSE2
GADD45G
PLAT
SIGLEC14
CBX2
GNG10
ZNF423
GRIK5
HIST1H2BI
LCE2A
HAPLN1
GLIS1
OR52D1
RGS17
PODXL
MMP7
ZBTB47
GPT
BMPER
AGTR1
CATSPER1
KCNH1
MAPK8IP2
PUDP
KCNH8
TIPIN
NACAD
RPL10L
SEMA3E
APOBEC2
USHBP1
ERP27
CEND1
SHC2
SLC9B2
RNF217
B9D2
SLIT1
CDH24
NRCAM
FAP
BEX1
ABCG4
UBAP2
KCNIP4
IRF4
TMEM121
SNPH
KLK12
DENND3
HAS2
ASUN
RASGRF2
LURAP1L
IGF2
TIE1
TNNC1
CASP12
ADCY4
TTL
CD34
SLC27A1
HIP1
